# Supplementary material for: Exploring the therapeutic mechanism of Yuebi decoction on nephrotic syndrome based on network pharmacology and experimental study
Source: publisher site journal article supplement (doi:10.18632/aging.206116), 2024-09-20
Supplement: Supplementary file [file aging-v16i18-206116-supplementary-material-SD1.pdf]

## SUPPLEMENTARY TABLES

**Supplementary Table 1. A total of 124 different active ingredients from TCMSP and literature in YBD.**

| <b>Ingredients</b>         | <b>Herb</b> | <b>Symbol</b> |
|----------------------------|-------------|---------------|
| (+)-Catechin               | MH          | A1            |
| (+)-Leucocyanidin          | MH          | MH1           |
| 24-Ethylcholest-4-en-3-one | MH          | MH2           |
| Beta-sitosterol            | MH          | B1            |
| Campest-5-en-3beta-ol      | MH          | MH3           |
| Delphinidin                | MH          | MH4           |
| Diosmetin                  | MH          | MH5           |
| Eriodictyol                | MH          | MH6           |
| Genkwanin                  | MH          | MH7           |
| Herbacetin                 | MH          | MH8           |
| Kaempferol                 | MH          | E1            |
| Leucopelargonidin          | MH          | MH9           |
| Luteolin                   | MH          | MH10          |
| Mandenol                   | MH          | MH11          |
| Naringenin                 | MH          | E2            |
| Pectolarigenin             | MH          | MH12          |
| Poriferast-5-en-3beta-ol   | MH          | D1            |
| Quercetin                  | MH          | C1            |
| Resivit                    | MH          | MH13          |
| Stigmasterol               | MH          | B2            |
| Taxifolin                  | MH          | MH14          |
| Truflex OBP                | MH          | MH15          |
| stepharine                 | DZ          | DZ1           |
| zizyphus saponin I Qt      | DZ          | DZ2           |
| coumestrol                 | DZ          | DZ3           |
| Daechuine S7               | DZ          | DZ4           |
| Jujubasaponin V Qt         | DZ          | DZ5           |
| Mauritine D                | DZ          | DZ6           |
| berberine                  | DZ          | DZ7           |
| (S)-Coclaurine             | DZ          | DZ8           |
| Mairin                     | DZ          | F1            |
| Stigmasterol               | DZ          | B2            |
| beta-sitosterol            | DZ          | B1            |
| Ruvoside Qt                | DZ          | DZ9           |
| (+)-catechin               | DZ          | A1            |
| Stepholidine               | DZ          | DZ10          |
| Nuciferin                  | DZ          | DZ11          |
| Fumarine                   | DZ          | DZ12          |
| beta-carotene              | DZ          | DZ13          |
| (-)-catechin               | DZ          | DZ14          |
| quercetin                  | DZ          | C1            |
| beta-sitosterol            | SJ          | B1            |
| 6-methylgingediacetate2    | SJ          | SJ1           |
| Stigmasterol               | SJ          | B2            |

|                                                                                                     |    |      |
|-----------------------------------------------------------------------------------------------------|----|------|
| poriferast-5-en-3beta-ol                                                                            | SJ | D1   |
| Dihydrocapsaicin                                                                                    | SJ | SJ2  |
| CaSO4                                                                                               | SG | SG   |
| quercetin                                                                                           | GC | C1   |
| Mairin                                                                                              | GC | F1   |
| Jaranol                                                                                             | GC | GC1  |
| isorhamnetin                                                                                        | GC | GC2  |
| sitosterol                                                                                          | GC | GC3  |
| formononetin                                                                                        | GC | GC4  |
| Calycosin                                                                                           | GC | GC5  |
| kaempferol                                                                                          | GC | GC6  |
| licochalcone a                                                                                      | GC | E1   |
| Vestitol                                                                                            | GC | GC7  |
| Inermine                                                                                            | GC | GC8  |
| DFV                                                                                                 | GC | GC9  |
| Glycyrol                                                                                            | GC | GC10 |
| Medicarpin                                                                                          | GC | GC11 |
| Lupiwighteone                                                                                       | GC | GC12 |
| 7-Methoxy-2-methyl isoflavone                                                                       | GC | GC13 |
| naringenin                                                                                          | GC | GC14 |
| (2S)-2-[4-hydroxy-3-(3-methylbut-2-enyl)phenyl]-8,8-dimethyl-2,3-dihydropyrano[2,3-f]chromen-4-one  | GC | E2   |
| euchrenone                                                                                          | GC | GC15 |
| glyasperin B                                                                                        | GC | GC16 |
| glyasperin F                                                                                        | GC | GC17 |
| Glyasperin C                                                                                        | GC | GC18 |
| Isotrifoliol                                                                                        | GC | GC19 |
| (E)-1-(2,4-dihydroxyphenyl)-3-(2,2-dimethylchromen-6-yl)prop-2-en-1-one                             | GC | GC20 |
| kanzonols W                                                                                         | GC | GC21 |
| (2S)-6-(2,4-dihydroxyphenyl)-2-(2-hydroxypropan-2-yl)-4-methoxy-2,3-dihydrofuro[3,2-g]chromen-7-one | GC | GC22 |
| Semilicoisoflavone B                                                                                | GC | GC23 |
| Glepidotin A                                                                                        | GC | GC24 |
| Glepidotin B                                                                                        | GC | GC25 |
| Phaseolinisoflavan                                                                                  | GC | GC26 |
| Glypallichalcone                                                                                    | GC | GC27 |
| 8-(6-hydroxy-2-benzofuranyl)-2,2-dimethyl-5-chromenol                                               | GC | GC28 |
| Licochalcone B                                                                                      | GC | GC29 |
| licochalcone G                                                                                      | GC | GC30 |
| 3-(2,4-dihydroxyphenyl)-8-(1,1-dimethylprop-2-enyl)-7-hydroxy-5-methoxy-coumarin                    | GC | GC31 |
| Licoricone                                                                                          | GC | GC32 |
| Gancaonin A                                                                                         | GC | GC33 |
| Gancaonin B                                                                                         | GC | GC34 |
| 3-(3,4-dihydroxyphenyl)-5,7-dihydroxy-8-(3-methylbut-2-enyl)chromone                                | GC | GC35 |
| 5,7-dihydroxy-3-(4-methoxyphenyl)-8-(3-methylbut-2-enyl)chromone                                    | GC | GC36 |
| 2-(3,4-dihydroxyphenyl)-5,7-dihydroxy-6-(3-methylbut-2-enyl)chromone                                | GC | GC37 |
| Glycyrin                                                                                            | GC | GC38 |
| Licocoumarone                                                                                       | GC | GC39 |
| Licoisoflavone                                                                                      | GC | GC40 |
| Licoisoflavone B                                                                                    | GC | GC41 |

|                                                                                           |    |      |
|-------------------------------------------------------------------------------------------|----|------|
| licoisoflavanone                                                                          | GC | GC42 |
| shinpterocarpin                                                                           | GC | GC43 |
| (E)-3-[3,4-dihydroxy-5-(3-methylbut-2-enyl)phenyl]-1-(2,4-dihydroxyphenyl)prop-2-en-1-one | GC | GC44 |
| liquiritin                                                                                | GC | GC45 |
| licopyranocoumarin                                                                        | GC | GC46 |
| Glyzaglabrin                                                                              | GC | GC47 |
| Glabridin                                                                                 | GC | GC48 |
| Glabranin                                                                                 | GC | GC49 |
| Glabrene                                                                                  | GC | GC50 |
| Glabrone                                                                                  | GC | GC51 |
| 1,3-dihydroxy-9-methoxy-6-benzofurano[3,2-c]chromenone                                    | GC | GC52 |
| 1,3-dihydroxy-8,9-dimethoxy-6-benzofurano[3,2-c]chromenone                                | GC | GC53 |
| Eurycarpin A                                                                              | GC | GC54 |
| (-)-Medicocarpin                                                                          | GC | GC55 |
| Sigmoidin-B                                                                               | GC | GC56 |
| (2R)-7-hydroxy-2-(4-hydroxyphenyl)chroman-4-one                                           | GC | GC57 |
| (2S)-7-hydroxy-2-(4-hydroxyphenyl)-8-(3-methylbut-2-enyl)chroman-4-one                    | GC | GC58 |
| Isoglycyrol                                                                               | GC | GC59 |
| Isolicoflavonol                                                                           | GC | GC60 |
| HMO                                                                                       | GC | GC61 |
| 1-Methoxyphaseollidin                                                                     | GC | GC62 |
| Quercetin der.                                                                            | GC | GC63 |
| 3'-Hydroxy-4'-O-Methylglabridin                                                           | GC | GC64 |
| 3'-Methoxyglabridin                                                                       | GC | GC65 |
| 2-[(3R)-8,8-dimethyl-3,4-dihydro-2H-pyrano[6,5-f]chromen-3-yl]-5-methoxyphenol            | GC | GC66 |
| Inflacoumarin A                                                                           | GC | GC67 |
| icos-5-enoic acid                                                                         | GC | GC68 |
| Kanzonol F                                                                                | GC | GC69 |
| 6-prenylated eriodictyol                                                                  | GC | GC70 |
| 7,2',4'-trihydroxy-5-methoxy-3-arylcoumarin                                               | GC | GC71 |
| 7-Acetoxy-2-methylisoflavone                                                              | GC | GC72 |
| 8-prenylated eriodictyol                                                                  | GC | GC73 |
| gadelaidic acid                                                                           | GC | GC74 |
| Gancaonin G                                                                               | GC | GC75 |
| Gancaonin H                                                                               | GC | GC76 |
| Licoagrocarpin                                                                            | GC | GC77 |
| Glyasperins M                                                                             | GC | GC78 |
| Glycyrrhiza flavonol A                                                                    | GC | GC79 |
| Licoagroisoflavone                                                                        | GC | GC80 |
| Odoratin                                                                                  | GC | GC81 |
| Phaseol                                                                                   | GC | GC82 |
| Xambioona                                                                                 | GC | GC83 |
| dehydroglyasperins C                                                                      | GC | GC84 |

**Supplementary Table 2. Targets information of different ingredients in YBD through SwissTargetPrediction and TCMSP.**

|         |        |          |        |         |        |         |        |         |        |
|---------|--------|----------|--------|---------|--------|---------|--------|---------|--------|
| PSMD3   | target | HSPB1    | target | RAF1    | target | GABRA2  | target | CHRNA7  | target |
| MMP2    | target | HMOX1    | target | RASSF1  | target | IKBKB   | target | CHRNA2  | target |
| HSPA5   | target | HK2      | target | RASA1   | target | MAPK8   | target | JUN     | target |
| ACHE    | target | NKX3-1   | target | ERBB2   | target | CHRM2   | target | TGFB1   | target |
| ACACA   | target | HAS2     | target | ERBB3   | target | SLC6A2  | target | F10     | target |
| AHSA1   | target | HIF1A    | target | RB1     | target | CA2     | target | ADH1C   | target |
| AKR1B1  | target | CHUK     | target | RXRA    | target | CDK4    | target | ADRA2A  | target |
| MAOB    | target | INSR     | target | RUNX2   | target | FOSL2   | target | MAOA    | target |
| AR      | target | IGF2     | target | CHEK2   | target | STAT3   | target | CTRB1   | target |
| BAX     | target | IGFBP3   | target | PON1    | target | HTR2A   | target | DRD5    | target |
| BCL2    | target | ICAM1    | target | STAT1   | target | CHRM4   | target | ADRA2B  | target |
| ALOX5   | target | IFNG     | target | SCN5A   | target | HTR3A   | target | DRD2    | target |
| AHR     | target | IRF1     | target | SLC2A4  | target | ADRA1D  | target | CYP2B6  | target |
| BIRC5   | target | IL1A     | target | MMP3    | target | IGHG1   | target | CDC37   | target |
| BCL2L1  | target | IL1B     | target | SOD1    | target | CHRM3   | target | PDE10A  | target |
| ADRB2   | target | IL10     | target | THBD    | target | OPRM1   | target | ADRA2C  | target |
| CASP3   | target | IL2      | target | F3      | target | KDR     | target | LACTB   | target |
| CASP8   | target | IL6      | target | PLAT    | target | OPRD1   | target | DRD4    | target |
| CASP9   | target | CXCL8    | target | E2F1    | target | DRD1    | target | HTR2C   | target |
| CTSD    | target | MMP1     | target | E2F2    | target | MAPK10  | target | TOP2    | target |
| CAV1    | target | MMP9     | target | RELA    | target | CHRM5   | target | PDE4    | target |
| CCL2    | target | MAPK1    | target | PRSS1   | target | ADRB1   | target | CACNA1S | target |
| CD40LG  | target | MYC      | target | NFATC3  | target | LTA4H   | target | CYP2B1  | target |
| TP53    | target | MPO      | target | DIO1    | target | HMGCR   | target | ALB     | target |
| CLDN4   | target | NQO1     | target | PLAU    | target | ABAT    | target | CTNNB1  | target |
| F7      | target | POR      | target | VCAM1   | target | ADIPOQ  | target | CASP7   | target |
| COL1A1  | target | NCF1     | target | VEGFA   | target | AKR1C1  | target | MMP10   | target |
| COL3A1  | target | NFKBIA   | target | PPP3CA  | target | APOB    | target | KLF7    | target |
| CRP     | target | NOS3     | target | PGR     | target | GOT1    | target | GRP78   | target |
| CXCL10  | target | NFE2L2   | target | CDK2    | target | BAD     | target | ABCG2   | target |
| CXCL11  | target | NCOA2    | target | ESR2    | target | CAT     | target | CDC2    | target |
| CXCL2   | target | NR1I2    | target | NOS2    | target | CYP19A1 | target | CDKN2A  | target |
| CDKN1A  | target | NR1I3    | target | CHEK1   | target | FASN    | target | IL8     | target |
| CYP1A1  | target | ODC1     | target | CCNA2   | target | GSR     | target | MGAM    | target |
| CYP1A2  | target | SPP1     | target | ESR1    | target | CES1    | target | HERC5   | target |
| CYP1B1  | target | PPARG    | target | GRIA2   | target | LDLR    | target | F2      | target |
| CYP3A4  | target | PPARA    | target | PYGM    | target | MTTP    | target | PPP3CB  | target |
| DCAF5   | target | PPARD    | target | GSK3B   | target | MAPK3   | target | ADCY2   | target |
| DPP4    | target | PTEN     | target | MAPK14  | target | ABCC1   | target | APP     | target |
| TOP1    | target | PIK3CG   | target | NCOA1   | target | PLB1    | target | XIAP    | target |
| TOP2A   | target | SERPINE1 | target | OLR1    | target | SOAT1   | target | MDM2    | target |
| DUOX2   | target | PARP1    | target | NR3C2   | target | SOAT2   | target | MET     | target |
| EGFR    | target | KCNH2    | target | HSD3B1  | target | SREBF1  | target | MCL1    | target |
| SELE    | target | PCOLCE   | target | HSD3B2  | target | UGT1A1  | target | NUF2    | target |
| SULT1E1 | target | EGF      | target | ADRA1A  | target | RXRB    | target | PCNA    | target |
| ELK1    | target | PTGER3   | target | ATP5F1B | target | KCNMA1  | target | PTGES   | target |
| EIF6    | target | PTGS1    | target | PKIA    | target | TFRC    | target | TYR     | target |
| CCND1   | target | PTGS2    | target | IL4     | target | FN1     | target | XDH     | target |
| CCNB1   | target | ACP3     | target | CHRM1   | target | TRPC6   | target | DGAT2   | target |
| GABRA1  | target | RUNX1T1  | target | MT-ND6  | target | PDE3A   | target |         |        |
| GJA1    | target | PRKCA    | target | SLC6A3  | target | GABRA3  | target |         |        |
| GSTM1   | target | PRKCB    | target | SLC6A4  | target | GABRA5  | target |         |        |

|       |        |        |        |        |        |        |        |
|-------|--------|--------|--------|--------|--------|--------|--------|
| GSTM2 | target | FOS    | target | AKR1C3 | target | HSP90  | target |
| GSTP1 | target | NPEPPS | target | ADRA1B | target | MAP2   | target |
| HSF1  | target | AKT1   | target | SLPI   | target | PRKACA | target |

**Supplementary Table 3. Overlapping targets information of drug targets and disease targets.**

MMP2  
XDH  
HSPB1  
NOS2  
COL1A1  
PPP3CA  
BCL2  
CRP  
GSTP1  
FN1  
EGF  
IL1A  
LDLR  
SPP1  
F2  
XIAP  
PTGS2  
OLR1  
CTNNB1  
CCND1  
CDK4  
NFATC3  
VEGFA  
TGFB1  
MYC  
CCNA2  
MT-ND6  
MMP1  
STAT1  
HMGCR  
NR3C2  
GSR  
HMOX1  
MMP3  
PPP3CB  
GSTM1  
IL10  
MAPK1  
PLAT  
MDM2  
EGFR  
SOD1  
ERBB2  
IL4  
AKR1B1  
TRPC6  
IGHG1  
RUNX2  
CXCL10  
TP53  
CASP9  
CDKN1A  
CAT  
RASA1

IL1B  
NFKBIA  
IGFBP3  
ALB  
SLC6A3  
LTA4H  
PLAU  
PTEN  
ALOX5  
RXRA  
CLDN4  
PON1  
E2F1  
APOB  
CASP8  
PPARG  
CXCL8  
SELE  
THBD  
MAPK14  
MPO  
PCNA  
CHUK  
STAT3  
SLPI  
ADRB2  
CTSD  
TFRC  
MCL1  
CCL2  
IL6  
CASP3  
PARP1  
MGAM  
KDR  
IGF2  
PIK3CG  
IL2  
IFNG  
FOS  
HSPA5  
ICAM1  
BCL2L1  
MAPK3  
HIF1A  
RELA  
NOS3  
SERPINE1  
VCAM1  
INSR  
AKT1  
PTGS1  
F3  
PYGM  
CDKN2A  
JUN  
BAX  
PRKCA  
CD40LG  
CYP3A4  
SCN5A

APP  
MMP9  
TOP1  
ADIPOQ

**Supplementary Table 5. Detail information on the known ligands of the top five targets.**

| Target | Known ligand | Full name of ligand                                                                                                                                                                                                                        | Molecular weight | Molecular formula | Affinity energy (kcal/mol) |
|--------|--------------|--------------------------------------------------------------------------------------------------------------------------------------------------------------------------------------------------------------------------------------------|------------------|-------------------|----------------------------|
| AKT1   | UC8          | ~{N}-methyl-6-[4-[[4-[2-oxidanylidene-6- (propanoylamino)-3~{H}-benzimidazol-1- yl]piperidin-1-yl]methyl]phenyl]-5-phenyl- pyridine-3-carboxamide                                                                                          | 588.7            | C35H36N6O3        | -6.2                       |
| TRPC6  | POV          | (2S)-3-(hexadecanoyloxy)-2- [(9Z)-octadec-9- enoyloxy]propyl 2-(trimethylammonio)ethyl phosphate                                                                                                                                           | 760.08           | C42H82NO8P        | -8.0                       |
| STAT3  | KQV          | [(2-{{[(5S,8S,10aR)-3-acetyl-8-((2S)-5-amino-1-[(diphenylmethyl)amino]- 1,5-dioxopentan-2- yl} carbamoyl)-6-oxodecahydropyrrolo[1,2-a][1,5]diazocin-5- yl} carbamoyl)-1H-indol-5- yl)(difluoro)methyl]phosphonic acid (non-preferred name) | 835.79           | 40H44F2N7O9       | -7.1                       |
| PPP3CA | PGE          | TRIETHYLENE GLYCOL                                                                                                                                                                                                                         | 150.17           | C6H14O4           | -7.8                       |
| NFATC  | 3ANP         | PHOSPHOAMINOPHOSPHONIC ACID-ADENYLATE ESTER                                                                                                                                                                                                | 506.2            | 10H17N6O12P       | -8.2                       |
