# Supplementary material for: Exploring the therapeutic mechanism of Yuebi decoction on nephrotic syndrome based on network pharmacology and experimental study
Source: publisher site journal article supplement (doi:10.18632/aging.206116), 2024-09-20
Supplement: Supplementary file [file aging-v16i18-206116-supplementary-material-SD2.pdf]

Supplementary Table 4. Detailed information on GO enrichment analysis.

| Category | Term                | Count | %           | PValue   | Genes      | List Total | Pop Hits |
|----------|---------------------|-------|-------------|----------|------------|------------|----------|
|          | GOTERM_BP_DGO:00459 | 37    | 31.09243697 | 5.04E-16 | APP, ADF   | 119        | 1201     |
|          | GOTERM_BP_DGO:00106 | 34    | 28.57142857 | 8.81E-25 | CRP, APP   | 119        | 513      |
|          | GOTERM_BP_DGO:00430 | 31    | 26.05042017 | 5.17E-21 | CDKN1A     | 119        | 526      |
|          | GOTERM_BP_DGO:00458 | 30    | 25.21008403 | 2.49E-16 | HIF1A, R   | 119        | 716      |
|          | GOTERM_BP_DGO:00424 | 27    | 22.68907563 | 4.58E-23 | CDKN1A     | 119        | 293      |
|          | GOTERM_BP_DGO:00082 | 25    | 21.00840336 | 2.90E-14 | PTEN, R    | 119        | 549      |
|          | GOTERM_BP_DGO:00430 | 23    | 19.32773109 | 5.43E-17 | APP, JUN   | 119        | 328      |
|          | GOTERM_BP_DGO:00069 | 23    | 19.32773109 | 1.59E-11 | JUN, PAR   | 119        | 607      |
|          | GOTERM_BP_DGO:00075 | 22    | 18.48739496 | 1.52E-20 | IL10, JUN  | 119        | 194      |
|          | GOTERM_BP_DGO:00069 | 22    | 18.48739496 | 7.07E-14 | CRP, TGF   | 119        | 411      |
|          | GOTERM_BP_DGO:00001 | 21    | 17.64705882 | 1.62E-06 | APP, JUN   | 119        | 967      |
|          | GOTERM_BP_DGO:00071 | 21    | 17.64705882 | 8.30E-05 | IL10, CXC  | 119        | 1267     |
|          | GOTERM_BP_DGO:00303 | 19    | 15.96638655 | 2.22E-14 | TGFB1, H   | 119        | 256      |
|          | GOTERM_BP_DGO:00094 | 18    | 15.12605042 | 1.17E-13 | IL10, JUN  | 119        | 241      |
|          | GOTERM_BP_DGO:00015 | 18    | 15.12605042 | 2.43E-13 | JUN, CXC   | 119        | 252      |
|          | GOTERM_BP_DGO:00019 | 17    | 14.28571429 | 1.83E-13 | APP, TGF   | 119        | 209      |
|          | GOTERM_BP_DGO:00082 | 17    | 14.28571429 | 2.10E-08 | IL10, APP  | 119        | 459      |
|          | GOTERM_BP_DGO:00714 | 16    | 13.44537815 | 7.48E-15 | TRPC6, P   | 119        | 140      |
|          | GOTERM_BP_DGO:00324 | 16    | 13.44537815 | 3.79E-14 | JUN, VCA   | 119        | 156      |
|          | GOTERM_BP_DGO:00106 | 16    | 13.44537815 | 6.72E-10 | APP, CDF   | 119        | 308      |
|          | GOTERM_BP_DGO:00323 | 15    | 12.60504202 | 6.91E-15 | TGFB1, P   | 119        | 112      |
|          | GOTERM_BP_DGO:00517 | 15    | 12.60504202 | 8.68E-09 | CDKN1A     | 119        | 316      |
|          | GOTERM_BP_DGO:00064 | 15    | 12.60504202 | 2.39E-06 | APP, TGF   | 119        | 501      |
|          | GOTERM_BP_DGO:00016 | 14    | 11.76470588 | 9.16E-11 | TGFB1, V   | 119        | 182      |
|          | GOTERM_BP_DGO:00712 | 14    | 11.76470588 | 1.90E-10 | IL10, CXC  | 119        | 193      |
|          | GOTERM_BP_DGO:00454 | 13    | 10.92436975 | 3.26E-11 | VCAM1, C   | 119        | 133      |
|          | GOTERM_BP_DGO:00713 | 13    | 10.92436975 | 7.68E-11 | VCAM1, C   | 119        | 143      |
|          | GOTERM_BP_DGO:00457 | 13    | 10.92436975 | 3.80E-10 | CXCL8, N   | 119        | 164      |
|          | GOTERM_BP_DGO:00703 | 13    | 10.92436975 | 1.61E-08 | APP, JUN   | 119        | 228      |
|          | GOTERM_BP_DGO:00065 | 13    | 10.92436975 | 8.06E-06 | MMP1, M    | 119        | 409      |
|          | GOTERM_BP_DGO:00458 | 13    | 10.92436975 | 2.72E-04 | JUN, TGF   | 119        | 590      |
|          | GOTERM_BP_DGO:00435 | 12    | 10.08403361 | 3.60E-09 | IL10, JUN  | 119        | 158      |
|          | GOTERM_BP_DGO:00434 | 12    | 10.08403361 | 4.11E-09 | APP, IL6,  | 119        | 160      |
|          | GOTERM_BP_DGO:00075 | 12    | 10.08403361 | 1.01E-07 | IL1A, CD   | 119        | 218      |
|          | GOTERM_BP_DGO:00069 | 12    | 10.08403361 | 1.06E-06 | CASP9, C   | 119        | 276      |
|          | GOTERM_BP_DGO:00071 | 12    | 10.08403361 | 6.30E-04 | COL1A1,    | 119        | 557      |
|          | GOTERM_BP_DGO:00486 | 11    | 9.243697479 | 1.48E-11 | IL6, TGFI  | 119        | 70       |
|          | GOTERM_BP_DGO:00096 | 11    | 9.243697479 | 1.36E-10 | CDKN1A     | 119        | 87       |
|          | GOTERM_BP_DGO:00355 | 11    | 9.243697479 | 4.52E-04 | CXCL8, T   | 119        | 450      |
|          | GOTERM_BP_DGO:00069 | 11    | 9.243697479 | 8.99E-04 | IL10, IL4, | 119        | 492      |
|          | GOTERM_BP_DGO:00712 | 10    | 8.403361345 | 2.66E-12 | JUN, CHU   | 119        | 41       |

|                     |    |             |          |            |     |     |
|---------------------|----|-------------|----------|------------|-----|-----|
| GOTERM_BP_DGO:19028 | 10 | 8.403361345 | 1.23E-11 | IL10, JUN  | 119 | 48  |
| GOTERM_BP_DGO:00425 | 10 | 8.403361345 | 3.16E-11 | MT-ND6,    | 119 | 53  |
| GOTERM_BP_DGO:00514 | 10 | 8.403361345 | 7.08E-10 | CASP9, AI  | 119 | 74  |
| GOTERM_BP_DGO:00328 | 10 | 8.403361345 | 2.28E-08 | PARP1, S   | 119 | 109 |
| GOTERM_BP_DGO:00510 | 10 | 8.403361345 | 6.22E-07 | APP, TGF   | 119 | 160 |
| GOTERM_BP_DGO:00421 | 10 | 8.403361345 | 7.65E-07 | NFKBIA,    | 119 | 164 |
| GOTERM_BP_DGO:00429 | 10 | 8.403361345 | 1.72E-05 | CASP9, C   | 119 | 240 |
| GOTERM_BP_DGO:00071 | 10 | 8.403361345 | 1.10E-04 | CXCL10, I  | 119 | 305 |
| GOTERM_BP_DGO:00346 | 9  | 7.56302521  | 5.20E-11 | JUN, CHU   | 119 | 37  |
| GOTERM_BP_DGO:00316 | 9  | 7.56302521  | 8.21E-11 | NFKBIA,    | 119 | 39  |
| GOTERM_BP_DGO:00015 | 9  | 7.56302521  | 2.31E-10 | MYC, MM    | 119 | 44  |
| GOTERM_BP_DGO:00340 | 9  | 7.56302521  | 7.99E-10 | PPP3CB, J  | 119 | 51  |
| GOTERM_BP_DGO:00481 | 9  | 7.56302521  | 2.01E-09 | CCNA2, C   | 119 | 57  |
| GOTERM_BP_DGO:00714 | 9  | 7.56302521  | 5.90E-09 | PCNA, N    | 119 | 65  |
| GOTERM_BP_DGO:00019 | 9  | 7.56302521  | 2.31E-08 | IL10, JUN  | 119 | 77  |
| GOTERM_BP_DGO:00434 | 9  | 7.56302521  | 3.14E-08 | APP, TGF   | 119 | 80  |
| GOTERM_BP_DGO:00331 | 9  | 7.56302521  | 8.70E-08 | APP, IL6,  | 119 | 91  |
| GOTERM_BP_DGO:00510 | 9  | 7.56302521  | 6.97E-07 | IL10, PPP  | 119 | 119 |
| GOTERM_BP_DGO:00518 | 9  | 7.56302521  | 1.21E-06 | APP, TGF   | 119 | 128 |
| GOTERM_BP_DGO:00192 | 9  | 7.56302521  | 5.34E-06 | IL1A, IL6, | 119 | 156 |
| GOTERM_BP_DGO:00181 | 9  | 7.56302521  | 1.58E-05 | CHUK, B    | 119 | 181 |
| GOTERM_BP_DGO:00431 | 9  | 7.56302521  | 2.42E-05 | IL1A, CAS  | 119 | 192 |
| GOTERM_BP_DGO:00971 | 8  | 6.722689076 | 1.58E-09 | IL4, IL1A, | 119 | 35  |
| GOTERM_BP_DGO:00350 | 8  | 6.722689076 | 4.28E-09 | MT-ND6,    | 119 | 40  |
| GOTERM_BP_DGO:00974 | 8  | 6.722689076 | 6.13E-09 | IL10, IL6, | 119 | 42  |
| GOTERM_BP_DGO:00515 | 8  | 6.722689076 | 1.62E-08 | COL1A1,    | 119 | 48  |
| GOTERM_BP_DGO:00435 | 8  | 6.722689076 | 2.18E-08 | TGFB1, N   | 119 | 50  |
| GOTERM_BP_DGO:00327 | 8  | 6.722689076 | 1.41E-07 | IL6, NOS   | 119 | 65  |
| GOTERM_BP_DGO:00356 | 8  | 6.722689076 | 1.74E-07 | NOS2, TF   | 119 | 67  |
| GOTERM_BP_DGO:00000 | 8  | 6.722689076 | 3.48E-07 | PPP3CA, C  | 119 | 74  |
| GOTERM_BP_DGO:00082 | 8  | 6.722689076 | 7.05E-07 | IL4, APP,  | 119 | 82  |
| GOTERM_BP_DGO:00712 | 8  | 6.722689076 | 1.06E-06 | COL1A1,    | 119 | 87  |
| GOTERM_BP_DGO:00507 | 8  | 6.722689076 | 5.13E-06 | NFKBIA,    | 119 | 110 |
| GOTERM_BP_DGO:00425 | 8  | 6.722689076 | 6.50E-06 | IL6, ALO   | 119 | 114 |
| GOTERM_BP_DGO:00016 | 8  | 6.722689076 | 1.19E-05 | COL1A1,    | 119 | 125 |
| GOTERM_BP_DGO:00001 | 8  | 6.722689076 | 1.39E-05 | TGFB1, M   | 119 | 128 |
| GOTERM_BP_DGO:00017 | 8  | 6.722689076 | 3.43E-04 | NOS3, M    | 119 | 213 |
| GOTERM_BP_DGO:00063 | 8  | 6.722689076 | 6.99E-04 | JUN, PAR   | 119 | 240 |
| GOTERM_BP_DGO:00103 | 7  | 5.882352941 | 1.97E-08 | IL1A, CX   | 119 | 29  |
| GOTERM_BP_DGO:00359 | 7  | 5.882352941 | 5.45E-08 | VCAM1, F   | 119 | 34  |
| GOTERM_BP_DGO:19047 | 7  | 5.882352941 | 3.12E-07 | IL10, CDF  | 119 | 45  |
| GOTERM_BP_DGO:00454 | 7  | 5.882352941 | 5.25E-07 | APP, IFN   | 119 | 49  |
| GOTERM_BP_DGO:00086 | 7  | 5.882352941 | 5.94E-07 | CASP9, B   | 119 | 50  |

|                     |   |             |          |             |     |     |
|---------------------|---|-------------|----------|-------------|-----|-----|
| GOTERM_BP_DGO:00714 | 7 | 5.882352941 | 1.06E-06 | TGFB1, C    | 119 | 55  |
| GOTERM_BP_DGO:00313 | 7 | 5.882352941 | 1.06E-06 | TGFB1, II   | 119 | 55  |
| GOTERM_BP_DGO:00346 | 7 | 5.882352941 | 1.61E-06 | CASP9, PC   | 119 | 59  |
| GOTERM_BP_DGO:00435 | 7 | 5.882352941 | 2.38E-06 | CASP9, AI   | 119 | 63  |
| GOTERM_BP_DGO:00076 | 7 | 5.882352941 | 4.44E-06 | CLDN4, J    | 119 | 70  |
| GOTERM_BP_DGO:00506 | 7 | 5.882352941 | 5.24E-06 | TGFB1, M    | 119 | 72  |
| GOTERM_BP_DGO:00075 | 7 | 5.882352941 | 7.18E-06 | VCAM1, T    | 119 | 76  |
| GOTERM_BP_DGO:00069 | 7 | 5.882352941 | 1.12E-05 | CASP9, C    | 119 | 82  |
| GOTERM_BP_DGO:00140 | 7 | 5.882352941 | 1.20E-05 | EGF, INS    | 119 | 83  |
| GOTERM_BP_DGO:00985 | 7 | 5.882352941 | 1.47E-05 | CXCL10, I   | 119 | 86  |
| GOTERM_BP_DGO:00713 | 7 | 5.882352941 | 1.91E-05 | CXCL8, M    | 119 | 90  |
| GOTERM_BP_DGO:00507 | 7 | 5.882352941 | 2.60E-05 | IL6, TGFI   | 119 | 95  |
| GOTERM_BP_DGO:00420 | 7 | 5.882352941 | 4.11E-05 | COL1A1, I   | 119 | 103 |
| GOTERM_BP_DGO:00327 | 7 | 5.882352941 | 4.11E-05 | IL1A, API   | 119 | 103 |
| GOTERM_BP_DGO:00069 | 7 | 5.882352941 | 9.64E-05 | APP, HMO    | 119 | 120 |
| GOTERM_BP_DGO:00507 | 7 | 5.882352941 | 1.44E-04 | IL10, IL4,  | 119 | 129 |
| GOTERM_BP_DGO:00083 | 7 | 5.882352941 | 3.88E-04 | RASA1, FI   | 119 | 155 |
| GOTERM_BP_DGO:00100 | 6 | 5.042016807 | 8.61E-08 | CCND1, T    | 119 | 19  |
| GOTERM_BP_DGO:00329 | 6 | 5.042016807 | 1.49E-07 | CRP, APP    | 119 | 21  |
| GOTERM_BP_DGO:00105 | 6 | 5.042016807 | 1.00E-06 | IL1A, IL6,  | 119 | 30  |
| GOTERM_BP_DGO:00466 | 6 | 5.042016807 | 1.40E-06 | CASP9, C    | 119 | 32  |
| GOTERM_BP_DGO:19001 | 6 | 5.042016807 | 1.64E-06 | TGFB1, T    | 119 | 33  |
| GOTERM_BP_DGO:20012 | 6 | 5.042016807 | 3.39E-06 | IL1A, IL1   | 119 | 38  |
| GOTERM_BP_DGO:00069 | 6 | 5.042016807 | 5.63E-06 | CRP, IL6,   | 119 | 42  |
| GOTERM_BP_DGO:00075 | 6 | 5.042016807 | 6.34E-06 | IL1B, MM    | 119 | 43  |
| GOTERM_BP_DGO:00507 | 6 | 5.042016807 | 9.91E-06 | IL6, PPP3   | 119 | 47  |
| GOTERM_BP_DGO:00713 | 6 | 5.042016807 | 9.91E-06 | COL1A1, I   | 119 | 47  |
| GOTERM_BP_DGO:00517 | 6 | 5.042016807 | 1.22E-05 | IL1A, TGI   | 119 | 49  |
| GOTERM_BP_DGO:00434 | 6 | 5.042016807 | 1.80E-05 | TGFB1, II   | 119 | 53  |
| GOTERM_BP_DGO:00105 | 6 | 5.042016807 | 1.97E-05 | IL10, STA   | 119 | 54  |
| GOTERM_BP_DGO:00148 | 6 | 5.042016807 | 2.36E-05 | IL10, IL6,  | 119 | 56  |
| GOTERM_BP_DGO:00072 | 6 | 5.042016807 | 3.59E-05 | NFKBIA,     | 119 | 61  |
| GOTERM_BP_DGO:00096 | 6 | 5.042016807 | 4.20E-05 | COL1A1, I   | 119 | 63  |
| GOTERM_BP_DGO:00327 | 6 | 5.042016807 | 4.89E-05 | APP, IL6,   | 119 | 65  |
| GOTERM_BP_DGO:00421 | 6 | 5.042016807 | 4.89E-05 | IL4, IL6, N | 119 | 65  |
| GOTERM_BP_DGO:00513 | 6 | 5.042016807 | 6.08E-05 | IL10, IL6,  | 119 | 68  |
| GOTERM_BP_DGO:00105 | 6 | 5.042016807 | 6.08E-05 | EGF, KDI    | 119 | 68  |
| GOTERM_BP_DGO:00082 | 6 | 5.042016807 | 1.32E-04 | NOS3, HM    | 119 | 80  |
| GOTERM_BP_DGO:00457 | 6 | 5.042016807 | 1.57E-04 | IL6, CDK    | 119 | 83  |
| GOTERM_BP_DGO:00015 | 6 | 5.042016807 | 1.76E-04 | COL1A1, I   | 119 | 85  |
| GOTERM_BP_DGO:00303 | 6 | 5.042016807 | 2.55E-04 | ERBB2, B    | 119 | 92  |
| GOTERM_BP_DGO:00071 | 6 | 5.042016807 | 3.93E-04 | JUN, TGF    | 119 | 101 |
| GOTERM_BP_DGO:00066 | 6 | 5.042016807 | 4.31E-04 | NFKBIA,     | 119 | 103 |

|                     |   |             |             |            |     |     |
|---------------------|---|-------------|-------------|------------|-----|-----|
| GOTERM_BP_DGO:00327 | 6 | 5.042016807 | 5.35E-04    | IL1A, API  | 119 | 108 |
| GOTERM_BP_DGO:00069 | 6 | 5.042016807 | 9.65E-04    | CXCL10, C  | 119 | 123 |
| GOTERM_BP_DGO:00303 | 6 | 5.042016807 | 0.001113182 | CDKN1A     | 119 | 127 |
| GOTERM_BP_DGO:00301 | 6 | 5.042016807 | 0.003493987 | COL1A1,    | 119 | 165 |
| GOTERM_BP_DGO:00301 | 6 | 5.042016807 | 0.004377391 | TRPC6, C   | 119 | 174 |
| GOTERM_BP_DGO:00082 | 6 | 5.042016807 | 0.005789142 | JUN, MYC   | 119 | 186 |
| GOTERM_BP_DGO:00072 | 6 | 5.042016807 | 0.010868971 | INSR, ER   | 119 | 217 |
| GOTERM_BP_DGO:00516 | 6 | 5.042016807 | 0.013935396 | IL6, IFNC  | 119 | 231 |
| GOTERM_BP_DGO:00104 | 6 | 5.042016807 | 0.020458325 | IL10, APP  | 119 | 255 |
| GOTERM_BP_DGO:00519 | 5 | 4.201680672 | 9.18E-07    | THBD, PI   | 119 | 13  |
| GOTERM_BP_DGO:00511 | 5 | 4.201680672 | 2.30E-06    | CHUK, C.   | 119 | 16  |
| GOTERM_BP_DGO:19040 | 5 | 4.201680672 | 2.30E-06    | CASP9, C.  | 119 | 16  |
| GOTERM_BP_DGO:00352 | 5 | 4.201680672 | 3.84E-06    | IL1A, IL1  | 119 | 18  |
| GOTERM_BP_DGO:00550 | 5 | 4.201680672 | 6.02E-06    | COL1A1,    | 119 | 20  |
| GOTERM_BP_DGO:00359 | 5 | 4.201680672 | 6.02E-06    | NFKBIA,    | 119 | 20  |
| GOTERM_BP_DGO:00101 | 5 | 4.201680672 | 6.02E-06    | THBD, CI   | 119 | 20  |
| GOTERM_BP_DGO:19028 | 5 | 4.201680672 | 7.40E-06    | APP, TGF   | 119 | 21  |
| GOTERM_BP_DGO:00018 | 5 | 4.201680672 | 9.00E-06    | JUN, BCL   | 119 | 22  |
| GOTERM_BP_DGO:00602 | 5 | 4.201680672 | 1.08E-05    | IL6, MYC,  | 119 | 23  |
| GOTERM_BP_DGO:00458 | 5 | 4.201680672 | 1.30E-05    | APP, IFN   | 119 | 24  |
| GOTERM_BP_DGO:00302 | 5 | 4.201680672 | 1.53E-05    | CASP8, IF  | 119 | 25  |
| GOTERM_BP_DGO:00108 | 5 | 4.201680672 | 2.11E-05    | NFKBIA,    | 119 | 27  |
| GOTERM_BP_DGO:19020 | 5 | 4.201680672 | 2.45E-05    | NOS3, SE   | 119 | 28  |
| GOTERM_BP_DGO:20012 | 5 | 4.201680672 | 2.45E-05    | BCL2, AK   | 119 | 28  |
| GOTERM_BP_DGO:00703 | 5 | 4.201680672 | 2.83E-05    | IL1B, GST  | 119 | 29  |
| GOTERM_BP_DGO:00108 | 5 | 4.201680672 | 3.25E-05    | APP, TGF   | 119 | 30  |
| GOTERM_BP_DGO:00458 | 5 | 4.201680672 | 3.25E-05    | IL1A, EGI  | 119 | 30  |
| GOTERM_BP_DGO:00432 | 5 | 4.201680672 | 3.71E-05    | CHUK, C.   | 119 | 31  |
| GOTERM_BP_DGO:00714 | 5 | 4.201680672 | 3.71E-05    | CDKN1A     | 119 | 31  |
| GOTERM_BP_DGO:00071 | 5 | 4.201680672 | 4.22E-05    | VCAM1, C   | 119 | 32  |
| GOTERM_BP_DGO:00346 | 5 | 4.201680672 | 6.06E-05    | CASP8, C.  | 119 | 35  |
| GOTERM_BP_DGO:20003 | 5 | 4.201680672 | 6.06E-05    | CDKN1A     | 119 | 35  |
| GOTERM_BP_DGO:00486 | 5 | 4.201680672 | 6.78E-05    | IFNG, NC   | 119 | 36  |
| GOTERM_BP_DGO:20003 | 5 | 4.201680672 | 6.78E-05    | IL10, IL4, | 119 | 36  |
| GOTERM_BP_DGO:00715 | 5 | 4.201680672 | 7.57E-05    | CASP9, T   | 119 | 37  |
| GOTERM_BP_DGO:00459 | 5 | 4.201680672 | 8.42E-05    | AKT1, HM   | 119 | 38  |
| GOTERM_BP_DGO:00705 | 5 | 4.201680672 | 1.03E-04    | APP, IL1E  | 119 | 40  |
| GOTERM_BP_DGO:00303 | 5 | 4.201680672 | 1.14E-04    | TGFB1, T   | 119 | 41  |
| GOTERM_BP_DGO:00094 | 5 | 4.201680672 | 1.25E-04    | CXCL10, C  | 119 | 42  |
| GOTERM_BP_DGO:19900 | 5 | 4.201680672 | 1.25E-04    | APP, HSP   | 119 | 42  |
| GOTERM_BP_DGO:19012 | 5 | 4.201680672 | 1.37E-04    | APP, CAS   | 119 | 43  |
| GOTERM_BP_DGO:00423 | 5 | 4.201680672 | 1.51E-04    | TGFB1, II  | 119 | 44  |
| GOTERM_BP_DGO:00308 | 5 | 4.201680672 | 1.64E-04    | IL4, CDK   | 119 | 45  |

|                     |   |             |                       |     |     |
|---------------------|---|-------------|-----------------------|-----|-----|
| GOTERM_BP_DGO:00327 | 5 | 4.201680672 | 1.64E-04 APP, IL6,    | 119 | 45  |
| GOTERM_BP_DGO:00434 | 5 | 4.201680672 | 1.64E-04 IL1B, GST    | 119 | 45  |
| GOTERM_BP_DGO:00311 | 5 | 4.201680672 | 1.64E-04 CCNA2, C     | 119 | 45  |
| GOTERM_BP_DGO:00075 | 5 | 4.201680672 | 1.95E-04 CCND1, I     | 119 | 47  |
| GOTERM_BP_DGO:19046 | 5 | 4.201680672 | 1.95E-04 APP, VCA     | 119 | 47  |
| GOTERM_BP_DGO:00485 | 5 | 4.201680672 | 2.12E-04 BCL2, MA     | 119 | 48  |
| GOTERM_BP_DGO:00107 | 5 | 4.201680672 | 2.29E-04 COL1A1,      | 119 | 49  |
| GOTERM_BP_DGO:00506 | 5 | 4.201680672 | 2.29E-04 EGF, KD      | 119 | 49  |
| GOTERM_BP_DGO:00421 | 5 | 4.201680672 | 2.68E-04 IL4, PPP3    | 119 | 51  |
| GOTERM_BP_DGO:00020 | 5 | 4.201680672 | 3.11E-04 TGFB1, C     | 119 | 53  |
| GOTERM_BP_DGO:00346 | 5 | 4.201680672 | 3.11E-04 IL1A, CX     | 119 | 53  |
| GOTERM_BP_DGO:00332 | 5 | 4.201680672 | 3.59E-04 NFKBIA,      | 119 | 55  |
| GOTERM_BP_DGO:00703 | 5 | 4.201680672 | 3.59E-04 EGF, MY      | 119 | 55  |
| GOTERM_BP_DGO:19047 | 5 | 4.201680672 | 3.59E-04 IL10, JUN    | 119 | 55  |
| GOTERM_BP_DGO:00068 | 5 | 4.201680672 | 4.40E-04 TFRC, MY     | 119 | 58  |
| GOTERM_BP_DGO:00713 | 5 | 4.201680672 | 4.40E-04 INSR, ER     | 119 | 58  |
| GOTERM_BP_DGO:00069 | 5 | 4.201680672 | 5.34E-04 IL6, IFN     | 119 | 61  |
| GOTERM_BP_DGO:00076 | 5 | 4.201680672 | 5.68E-04 APP, PPP     | 119 | 62  |
| GOTERM_BP_DGO:00018 | 5 | 4.201680672 | 7.20E-04 IL10, IL1A   | 119 | 66  |
| GOTERM_BP_DGO:00076 | 5 | 4.201680672 | 7.20E-04 APP, CAS     | 119 | 66  |
| GOTERM_BP_DGO:00060 | 5 | 4.201680672 | 7.63E-04 MYC, AD      | 119 | 67  |
| GOTERM_BP_DGO:00431 | 5 | 4.201680672 | 8.52E-04 MDM2, X      | 119 | 69  |
| GOTERM_BP_DGO:19012 | 5 | 4.201680672 | 9.00E-04 APP, IL1E    | 119 | 70  |
| GOTERM_BP_DGO:00436 | 5 | 4.201680672 | 1.00E-03 CCND1, M     | 119 | 72  |
| GOTERM_BP_DGO:00336 | 5 | 4.201680672 | 0.001052885 INSR, ER  | 119 | 73  |
| GOTERM_BP_DGO:00703 | 5 | 4.201680672 | 0.001107837 IL6, PCN  | 119 | 74  |
| GOTERM_BP_DGO:00971 | 5 | 4.201680672 | 0.001223723 CASP8, C  | 119 | 76  |
| GOTERM_BP_DGO:00988 | 5 | 4.201680672 | 0.001284734 GSTP1, A  | 119 | 77  |
| GOTERM_BP_DGO:00328 | 5 | 4.201680672 | 0.001284734 IL10, CAT | 119 | 77  |
| GOTERM_BP_DGO:00019 | 5 | 4.201680672 | 0.001480495 TGFB1, IC | 119 | 80  |
| GOTERM_BP_DGO:00305 | 5 | 4.201680672 | 0.00162199 CXCL10, C  | 119 | 82  |
| GOTERM_BP_DGO:00076 | 5 | 4.201680672 | 0.002016384 APP, PPP  | 119 | 87  |
| GOTERM_BP_DGO:00075 | 5 | 4.201680672 | 0.002102533 THBD, PI  | 119 | 88  |
| GOTERM_BP_DGO:00072 | 5 | 4.201680672 | 0.002282397 CCNA2, C  | 119 | 90  |
| GOTERM_BP_DGO:00316 | 5 | 4.201680672 | 0.002571664 CDKN2A    | 119 | 93  |
| GOTERM_BP_DGO:00075 | 5 | 4.201680672 | 0.00288517 THBD, CI   | 119 | 96  |
| GOTERM_BP_DGO:00713 | 5 | 4.201680672 | 0.003223883 NOS2, ST  | 119 | 99  |
| GOTERM_BP_DGO:00467 | 5 | 4.201680672 | 0.00346417 TFRC, IN   | 119 | 101 |
| GOTERM_BP_DGO:00507 | 5 | 4.201680672 | 0.004117583 ALOX5, X  | 119 | 106 |
| GOTERM_BP_DGO:00902 | 5 | 4.201680672 | 0.004547126 COL1A1,   | 119 | 109 |
| GOTERM_BP_DGO:00096 | 5 | 4.201680672 | 0.004849667 IFNG, CH  | 119 | 111 |
| GOTERM_BP_DGO:00165 | 5 | 4.201680672 | 0.007558199 CXCL10, S | 119 | 126 |
| GOTERM_BP_DGO:00163 | 5 | 4.201680672 | 0.008198383 STAT3, A  | 119 | 129 |

|                     |   |             |             |           |     |     |
|---------------------|---|-------------|-------------|-----------|-----|-----|
| GOTERM_BP_DGO:00181 | 5 | 4.201680672 | 0.01058629  | EGF, INS  | 119 | 139 |
| GOTERM_BP_DGO:00467 | 5 | 4.201680672 | 0.025325627 | INSR, ER  | 119 | 181 |
| GOTERM_BP_DGO:00986 | 5 | 4.201680672 | 0.029552228 | VCAM1, I  | 119 | 190 |
| GOTERM_BP_DGO:00068 | 5 | 4.201680672 | 0.039193239 | APP, OLR  | 119 | 208 |
| GOTERM_BP_DGO:00335 | 4 | 3.361344538 | 7.71E-06    | IL1A, GS  | 119 | 7   |
| GOTERM_BP_DGO:00108 | 4 | 3.361344538 | 2.61E-05    | NFKBIA,   | 119 | 10  |
| GOTERM_BP_DGO:00714 | 4 | 3.361344538 | 3.57E-05    | MMP1, M   | 119 | 11  |
| GOTERM_BP_DGO:19038 | 4 | 3.361344538 | 4.74E-05    | IL6, TGFI | 119 | 12  |
| GOTERM_BP_DGO:00107 | 4 | 3.361344538 | 6.13E-05    | NFKBIA,   | 119 | 13  |
| GOTERM_BP_DGO:00343 | 4 | 3.361344538 | 7.77E-05    | ADIPOQ,   | 119 | 14  |
| GOTERM_BP_DGO:00302 | 4 | 3.361344538 | 1.19E-04    | MAPK1, M  | 119 | 16  |
| GOTERM_BP_DGO:00903 | 4 | 3.361344538 | 1.19E-04    | CDKN1A    | 119 | 16  |
| GOTERM_BP_DGO:00466 | 4 | 3.361344538 | 1.19E-04    | IL1A, TFF | 119 | 16  |
| GOTERM_BP_DGO:00481 | 4 | 3.361344538 | 1.43E-04    | APP, IFN  | 119 | 17  |
| GOTERM_BP_DGO:00086 | 4 | 3.361344538 | 1.43E-04    | CDKN2A    | 119 | 17  |
| GOTERM_BP_DGO:00517 | 4 | 3.361344538 | 1.71E-04    | IFNG, ST  | 119 | 18  |
| GOTERM_BP_DGO:00332 | 4 | 3.361344538 | 1.71E-04    | CXCL10,   | 119 | 18  |
| GOTERM_BP_DGO:00427 | 4 | 3.361344538 | 2.02E-04    | PLAU, SE  | 119 | 19  |
| GOTERM_BP_DGO:00308 | 4 | 3.361344538 | 2.37E-04    | IL10, CDF | 119 | 20  |
| GOTERM_BP_DGO:00457 | 4 | 3.361344538 | 3.17E-04    | TFRC, SP  | 119 | 22  |
| GOTERM_BP_DGO:00380 | 4 | 3.361344538 | 3.17E-04    | INSR, KD  | 119 | 22  |
| GOTERM_BP_DGO:00020 | 4 | 3.361344538 | 3.63E-04    | STAT1, M  | 119 | 23  |
| GOTERM_BP_DGO:00705 | 4 | 3.361344538 | 4.13E-04    | PON1, CA  | 119 | 24  |
| GOTERM_BP_DGO:00512 | 4 | 3.361344538 | 4.13E-04    | NFKBIA,   | 119 | 24  |
| GOTERM_BP_DGO:00458 | 4 | 3.361344538 | 4.13E-04    | AKT1, PL  | 119 | 24  |
| GOTERM_BP_DGO:00971 | 4 | 3.361344538 | 4.68E-04    | CASP9, C  | 119 | 25  |
| GOTERM_BP_DGO:00075 | 4 | 3.361344538 | 4.68E-04    | BCL2, TP  | 119 | 25  |
| GOTERM_BP_DGO:00400 | 4 | 3.361344538 | 4.68E-04    | APP, CDF  | 119 | 25  |
| GOTERM_BP_DGO:00020 | 4 | 3.361344538 | 5.26E-04    | EGF, INS  | 119 | 26  |
| GOTERM_BP_DGO:00466 | 4 | 3.361344538 | 5.89E-04    | SPP1, MA  | 119 | 27  |
| GOTERM_BP_DGO:00350 | 4 | 3.361344538 | 6.57E-04    | APP, TGF  | 119 | 28  |
| GOTERM_BP_DGO:00017 | 4 | 3.361344538 | 8.07E-04    | IL4, APP, | 119 | 30  |
| GOTERM_BP_DGO:00430 | 4 | 3.361344538 | 8.90E-04    | BCL2, IGI | 119 | 31  |
| GOTERM_BP_DGO:00518 | 4 | 3.361344538 | 8.90E-04    | BCL2, BA  | 119 | 31  |
| GOTERM_BP_DGO:00423 | 4 | 3.361344538 | 8.90E-04    | APP, EGF  | 119 | 31  |
| GOTERM_BP_DGO:00433 | 4 | 3.361344538 | 9.77E-04    | NFKBIA,   | 119 | 32  |
| GOTERM_BP_DGO:00430 | 4 | 3.361344538 | 9.77E-04    | PPP3CB,   | 119 | 32  |
| GOTERM_BP_DGO:00457 | 4 | 3.361344538 | 9.77E-04    | JUN, PCN  | 119 | 32  |
| GOTERM_BP_DGO:00162 | 4 | 3.361344538 | 9.77E-04    | IL4, KDR  | 119 | 32  |
| GOTERM_BP_DGO:00433 | 4 | 3.361344538 | 0.001070272 | EGF, MYC  | 119 | 33  |
| GOTERM_BP_DGO:00457 | 4 | 3.361344538 | 0.001070272 | CDKN1A    | 119 | 33  |
| GOTERM_BP_DGO:00443 | 4 | 3.361344538 | 0.001070272 | COL1A1,   | 119 | 33  |
| GOTERM_BP_DGO:00481 | 4 | 3.361344538 | 0.00116863  | MYC, GS   | 119 | 34  |

|                     |   |             |             |             |     |    |
|---------------------|---|-------------|-------------|-------------|-----|----|
| GOTERM_BP_DGO:00971 | 4 | 3.361344538 | 0.00116863  | CASP9, CI   | 119 | 34 |
| GOTERM_BP_DGO:00456 | 4 | 3.361344538 | 0.00116863  | STAT1, S1   | 119 | 34 |
| GOTERM_BP_DGO:00519 | 4 | 3.361344538 | 0.00116863  | MYC, MA     | 119 | 34 |
| GOTERM_BP_DGO:00900 | 4 | 3.361344538 | 0.00127251  | KDR, HM     | 119 | 35 |
| GOTERM_BP_DGO:00484 | 4 | 3.361344538 | 0.001382026 | CTNNB1,     | 119 | 36 |
| GOTERM_BP_DGO:00457 | 4 | 3.361344538 | 0.001382026 | IL6, ERBI   | 119 | 36 |
| GOTERM_BP_DGO:00464 | 4 | 3.361344538 | 0.001497291 | IL10, IL6,  | 119 | 37 |
| GOTERM_BP_DGO:00325 | 4 | 3.361344538 | 0.001497291 | CLDN4, T    | 119 | 37 |
| GOTERM_BP_DGO:00463 | 4 | 3.361344538 | 0.001745499 | INSR, AD    | 119 | 39 |
| GOTERM_BP_DGO:00422 | 4 | 3.361344538 | 0.001745499 | MT-ND6,     | 119 | 39 |
| GOTERM_BP_DGO:00714 | 4 | 3.361344538 | 0.002017977 | CDKN1A      | 119 | 41 |
| GOTERM_BP_DGO:00305 | 4 | 3.361344538 | 0.002017977 | MMP1, M     | 119 | 41 |
| GOTERM_BP_DGO:00327 | 4 | 3.361344538 | 0.002017977 | IL4, IL6, C | 119 | 41 |
| GOTERM_BP_DGO:00072 | 4 | 3.361344538 | 0.002017977 | IFNG, ST    | 119 | 41 |
| GOTERM_BP_DGO:00713 | 4 | 3.361344538 | 0.002163568 | IL10, CCN   | 119 | 42 |
| GOTERM_BP_DGO:00327 | 4 | 3.361344538 | 0.002315524 | CD40LG,     | 119 | 43 |
| GOTERM_BP_DGO:00305 | 4 | 3.361344538 | 0.002315524 | RXRA, TC    | 119 | 43 |
| GOTERM_BP_DGO:00421 | 4 | 3.361344538 | 0.002638904 | IL10, CD4   | 119 | 45 |
| GOTERM_BP_DGO:00140 | 4 | 3.361344538 | 0.002638904 | ERBB2, P'   | 119 | 45 |
| GOTERM_BP_DGO:00421 | 4 | 3.361344538 | 0.002638904 | NOS2, HM    | 119 | 45 |
| GOTERM_BP_DGO:00226 | 4 | 3.361344538 | 0.002810508 | MMP1, M     | 119 | 46 |
| GOTERM_BP_DGO:00067 | 4 | 3.361344538 | 0.002988838 | GSTM1, C    | 119 | 47 |
| GOTERM_BP_DGO:00071 | 4 | 3.361344538 | 0.003366014 | TGFB1, E    | 119 | 49 |
| GOTERM_BP_DGO:00720 | 4 | 3.361344538 | 0.003984262 | KDR, CTI    | 119 | 52 |
| GOTERM_BP_DGO:00971 | 4 | 3.361344538 | 0.003984262 | TGFB1, C    | 119 | 52 |
| GOTERM_BP_DGO:00094 | 4 | 3.361344538 | 0.004204646 | NOS3, HS    | 119 | 53 |
| GOTERM_BP_DGO:00431 | 4 | 3.361344538 | 0.004204646 | CASP8, S1   | 119 | 53 |
| GOTERM_BP_DGO:00000 | 4 | 3.361344538 | 0.004204646 | CCNA2, C    | 119 | 53 |
| GOTERM_BP_DGO:20000 | 4 | 3.361344538 | 0.004204646 | CDKN1A      | 119 | 53 |
| GOTERM_BP_DGO:00903 | 4 | 3.361344538 | 0.004432301 | CDKN1A      | 119 | 54 |
| GOTERM_BP_DGO:00192 | 4 | 3.361344538 | 0.004667295 | MAPK1, C    | 119 | 55 |
| GOTERM_BP_DGO:00434 | 4 | 3.361344538 | 0.004909697 | COL1A1,     | 119 | 56 |
| GOTERM_BP_DGO:00455 | 4 | 3.361344538 | 0.005416981 | IL6, TGFI   | 119 | 58 |
| GOTERM_BP_DGO:20001 | 4 | 3.361344538 | 0.005416981 | CDKN1A      | 119 | 58 |
| GOTERM_BP_DGO:00712 | 4 | 3.361344538 | 0.005681986 | COL1A1,     | 119 | 59 |
| GOTERM_BP_DGO:00457 | 4 | 3.361344538 | 0.005681986 | PPP3CA, I   | 119 | 59 |
| GOTERM_BP_DGO:00713 | 4 | 3.361344538 | 0.005954647 | APP, HSP    | 119 | 60 |
| GOTERM_BP_DGO:00424 | 4 | 3.361344538 | 0.005954647 | BAX, CTN    | 119 | 60 |
| GOTERM_BP_DGO:00719 | 4 | 3.361344538 | 0.00652316  | CD40LG,     | 119 | 62 |
| GOTERM_BP_DGO:00015 | 4 | 3.361344538 | 0.006819121 | TGFB1, R    | 119 | 63 |
| GOTERM_BP_DGO:00301 | 4 | 3.361344538 | 0.007122955 | IL6, CD4C   | 119 | 64 |
| GOTERM_BP_DGO:00029 | 4 | 3.361344538 | 0.007122955 | CASP9, B0   | 119 | 64 |
| GOTERM_BP_DGO:00301 | 4 | 3.361344538 | 0.008417974 | CASP3, M    | 119 | 68 |

|                     |   |             |             |             |     |     |
|---------------------|---|-------------|-------------|-------------|-----|-----|
| GOTERM_BP_DGO:00425 | 4 | 3.361344538 | 0.008761877 | IL4, IL6, I | 119 | 69  |
| GOTERM_BP_DGO:00096 | 4 | 3.361344538 | 0.009113922 | TGFB1, M    | 119 | 70  |
| GOTERM_BP_DGO:00064 | 4 | 3.361344538 | 0.009474149 | CDKN2A      | 119 | 71  |
| GOTERM_BP_DGO:00181 | 4 | 3.361344538 | 0.009474149 | BCL2, MA    | 119 | 71  |
| GOTERM_BP_DGO:00068 | 4 | 3.361344538 | 0.010997602 | INSR, AD    | 119 | 75  |
| GOTERM_BP_DGO:00320 | 4 | 3.361344538 | 0.010997602 | CDKN1A      | 119 | 75  |
| GOTERM_BP_DGO:00097 | 4 | 3.361344538 | 0.011399268 | TGFB1, C    | 119 | 76  |
| GOTERM_BP_DGO:00456 | 4 | 3.361344538 | 0.011809317 | PPP3CA, I   | 119 | 77  |
| GOTERM_BP_DGO:00327 | 4 | 3.361344538 | 0.011809317 | IL10, IL4,  | 119 | 77  |
| GOTERM_BP_DGO:00301 | 4 | 3.361344538 | 0.015881086 | IL10, IL4,  | 119 | 86  |
| GOTERM_BP_DGO:00076 | 4 | 3.361344538 | 0.016376254 | APP, PTE    | 119 | 87  |
| GOTERM_BP_DGO:00104 | 4 | 3.361344538 | 0.016880032 | ADIPOQ,     | 119 | 88  |
| GOTERM_BP_DGO:00305 | 4 | 3.361344538 | 0.016880032 | TGFB1, P    | 119 | 88  |
| GOTERM_BP_DGO:00320 | 4 | 3.361344538 | 0.018981482 | NFKBIA,     | 119 | 92  |
| GOTERM_BP_DGO:00712 | 4 | 3.361344538 | 0.018981482 | JUN, HSP    | 119 | 92  |
| GOTERM_BP_DGO:00508 | 4 | 3.361344538 | 0.020084137 | APP, IL6,   | 119 | 94  |
| GOTERM_BP_DGO:00463 | 4 | 3.361344538 | 0.022393539 | IL1A, API   | 119 | 98  |
| GOTERM_BP_DGO:00063 | 4 | 3.361344538 | 0.029459996 | CCNA2, E    | 119 | 109 |
| GOTERM_BP_DGO:00618 | 4 | 3.361344538 | 0.029459996 | CXCL10, I   | 119 | 109 |
| GOTERM_BP_DGO:00701 | 3 | 2.521008403 | 1.11E-04    | CCND1, A    | 119 | 3   |
| GOTERM_BP_DGO:00973 | 3 | 2.521008403 | 2.22E-04    | CXCL10, I   | 119 | 4   |
| GOTERM_BP_DGO:00421 | 3 | 2.521008403 | 3.68E-04    | APOB, C7    | 119 | 5   |
| GOTERM_BP_DGO:00022 | 3 | 2.521008403 | 3.68E-04    | IL1A, TGI   | 119 | 5   |
| GOTERM_BP_DGO:00380 | 3 | 2.521008403 | 3.68E-04    | KDR, HSI    | 119 | 5   |
| GOTERM_BP_DGO:00614 | 3 | 2.521008403 | 5.50E-04    | HIF1A, TI   | 119 | 6   |
| GOTERM_BP_DGO:00320 | 3 | 2.521008403 | 5.50E-04    | CASP9, C    | 119 | 6   |
| GOTERM_BP_DGO:00105 | 3 | 2.521008403 | 7.66E-04    | IL6, IL1B,  | 119 | 7   |
| GOTERM_BP_DGO:00107 | 3 | 2.521008403 | 7.66E-04    | TGFB1, S'   | 119 | 7   |
| GOTERM_BP_DGO:00604 | 3 | 2.521008403 | 7.66E-04    | MAPK1, C    | 119 | 7   |
| GOTERM_BP_DGO:00381 | 3 | 2.521008403 | 0.001017751 | EGF, ERE    | 119 | 8   |
| GOTERM_BP_DGO:00105 | 3 | 2.521008403 | 0.001017751 | THBD, N     | 119 | 8   |
| GOTERM_BP_DGO:00107 | 3 | 2.521008403 | 0.001017751 | PLAU, SE    | 119 | 8   |
| GOTERM_BP_DGO:00026 | 3 | 2.521008403 | 0.001017751 | IL4, GSTF   | 119 | 8   |
| GOTERM_BP_DGO:00713 | 3 | 2.521008403 | 0.001017751 | MDM2, B     | 119 | 8   |
| GOTERM_BP_DGO:00509 | 3 | 2.521008403 | 0.001303296 | IL1A, IL1   | 119 | 9   |
| GOTERM_BP_DGO:00511 | 3 | 2.521008403 | 0.001303296 | GSTM1, A    | 119 | 9   |
| GOTERM_BP_DGO:00328 | 3 | 2.521008403 | 0.001622598 | GSTP1, M    | 119 | 10  |
| GOTERM_BP_DGO:00443 | 3 | 2.521008403 | 0.001622598 | CCNA2, S    | 119 | 10  |
| GOTERM_BP_DGO:19015 | 3 | 2.521008403 | 0.001622598 | JUN, REL    | 119 | 10  |
| GOTERM_BP_DGO:00149 | 3 | 2.521008403 | 0.001622598 | PLAU, BC    | 119 | 10  |
| GOTERM_BP_DGO:00443 | 3 | 2.521008403 | 0.001622598 | CASP9, M    | 119 | 10  |
| GOTERM_BP_DGO:19037 | 3 | 2.521008403 | 0.001975239 | PPP3CA, '   | 119 | 11  |
| GOTERM_BP_DGO:19000 | 3 | 2.521008403 | 0.001975239 | NOS2, AI    | 119 | 11  |



|                     |   |             |             |            |     |    |
|---------------------|---|-------------|-------------|------------|-----|----|
| GOTERM_BP_DGO:19903 | 3 | 2.521008403 | 0.002360807 | CCNA2, I   | 119 | 12 |
| GOTERM_BP_DGO:00509 | 3 | 2.521008403 | 0.002360807 | KDR, F3,   | 119 | 12 |
| GOTERM_BP_DGO:00324 | 3 | 2.521008403 | 0.002360807 | NFKBIA,    | 119 | 12 |
| GOTERM_BP_DGO:00603 | 3 | 2.521008403 | 0.002360807 | IFNG, ST   | 119 | 12 |
| GOTERM_BP_DGO:20002 | 3 | 2.521008403 | 0.002360807 | IL10, IFN  | 119 | 12 |
| GOTERM_BP_DGO:00194 | 3 | 2.521008403 | 0.002778891 | NOS3, MI   | 119 | 13 |
| GOTERM_BP_DGO:00469 | 3 | 2.521008403 | 0.002778891 | STAT3, B   | 119 | 13 |
| GOTERM_BP_DGO:00485 | 3 | 2.521008403 | 0.002778891 | BCL2, HII  | 119 | 13 |
| GOTERM_BP_DGO:00107 | 3 | 2.521008403 | 0.002778891 | APP, ADI   | 119 | 13 |
| GOTERM_BP_DGO:00519 | 3 | 2.521008403 | 0.003229085 | NOS3, PT   | 119 | 14 |
| GOTERM_BP_DGO:19049 | 3 | 2.521008403 | 0.003229085 | IL6, REL   | 119 | 14 |
| GOTERM_BP_DGO:00453 | 3 | 2.521008403 | 0.003710986 | IL10, IL4, | 119 | 15 |
| GOTERM_BP_DGO:20011 | 3 | 2.521008403 | 0.003710986 | IL4, MYC,  | 119 | 15 |
| GOTERM_BP_DGO:19046 | 3 | 2.521008403 | 0.003710986 | MMP2, M    | 119 | 15 |
| GOTERM_BP_DGO:00331 | 3 | 2.521008403 | 0.003710986 | PPP3CA, I  | 119 | 15 |
| GOTERM_BP_DGO:00322 | 3 | 2.521008403 | 0.003710986 | NFKBIA,    | 119 | 15 |
| GOTERM_BP_DGO:00218 | 3 | 2.521008403 | 0.004224196 | MYC, BA    | 119 | 16 |
| GOTERM_BP_DGO:00193 | 3 | 2.521008403 | 0.004224196 | ADIPOQ,    | 119 | 16 |
| GOTERM_BP_DGO:00431 | 3 | 2.521008403 | 0.004224196 | TGFB1, K   | 119 | 16 |
| GOTERM_BP_DGO:00003 | 3 | 2.521008403 | 0.004224196 | GSTP1, C   | 119 | 16 |
| GOTERM_BP_DGO:00457 | 3 | 2.521008403 | 0.004224196 | INSR, IGI  | 119 | 16 |
| GOTERM_BP_DGO:00442 | 3 | 2.521008403 | 0.00476832  | MMP1, M    | 119 | 17 |
| GOTERM_BP_DGO:00607 | 3 | 2.521008403 | 0.005342966 | CCND1, I   | 119 | 18 |
| GOTERM_BP_DGO:00510 | 3 | 2.521008403 | 0.005342966 | APP, IFN   | 119 | 18 |
| GOTERM_BP_DGO:00302 | 3 | 2.521008403 | 0.005947745 | JUN, PPA   | 119 | 19 |
| GOTERM_BP_DGO:00603 | 3 | 2.521008403 | 0.005947745 | TGFB1, P   | 119 | 19 |
| GOTERM_BP_DGO:00507 | 3 | 2.521008403 | 0.005947745 | TGFB1, A   | 119 | 19 |
| GOTERM_BP_DGO:00020 | 3 | 2.521008403 | 0.005947745 | TGFB1, N   | 119 | 19 |
| GOTERM_BP_DGO:00102 | 3 | 2.521008403 | 0.005947745 | IL1A, CD   | 119 | 19 |
| GOTERM_BP_DGO:20008 | 3 | 2.521008403 | 0.005947745 | BCL2, BC   | 119 | 19 |
| GOTERM_BP_DGO:00514 | 3 | 2.521008403 | 0.006582274 | CDKN1A     | 119 | 20 |
| GOTERM_BP_DGO:00610 | 3 | 2.521008403 | 0.006582274 | ALOX5, S   | 119 | 20 |
| GOTERM_BP_DGO:00106 | 3 | 2.521008403 | 0.006582274 | PTEN, HI   | 119 | 20 |
| GOTERM_BP_DGO:00071 | 3 | 2.521008403 | 0.006582274 | EGF, AD    | 119 | 20 |
| GOTERM_BP_DGO:00018 | 3 | 2.521008403 | 0.006582274 | IGF2, HIF  | 119 | 20 |
| GOTERM_BP_DGO:19900 | 3 | 2.521008403 | 0.007246171 | APP, CDF   | 119 | 21 |
| GOTERM_BP_DGO:00066 | 3 | 2.521008403 | 0.007246171 | GSTM1, C   | 119 | 21 |
| GOTERM_BP_DGO:00704 | 3 | 2.521008403 | 0.007246171 | IL1B, REI  | 119 | 21 |
| GOTERM_BP_DGO:00102 | 3 | 2.521008403 | 0.007246171 | APP, CDF   | 119 | 21 |
| GOTERM_BP_DGO:19020 | 3 | 2.521008403 | 0.007246171 | IFNG, CA   | 119 | 21 |
| GOTERM_BP_DGO:00020 | 3 | 2.521008403 | 0.007246171 | KDR, AK    | 119 | 21 |
| GOTERM_BP_DGO:00068 | 3 | 2.521008403 | 0.00793906  | NOS2, NC   | 119 | 22 |
| GOTERM_BP_DGO:00069 | 3 | 2.521008403 | 0.00793906  | CDKN1A     | 119 | 22 |

|                     |   |             |             |            |     |    |
|---------------------|---|-------------|-------------|------------|-----|----|
| GOTERM_BP_DGO:00900 | 3 | 2.521008403 | 0.008660565 | CXCL10, I  | 119 | 23 |
| GOTERM_BP_DGO:00488 | 3 | 2.521008403 | 0.009410316 | APOB, LI   | 119 | 24 |
| GOTERM_BP_DGO:00380 | 3 | 2.521008403 | 0.009410316 | CHUK, A    | 119 | 24 |
| GOTERM_BP_DGO:20003 | 3 | 2.521008403 | 0.009410316 | BCL2, HI   | 119 | 24 |
| GOTERM_BP_DGO:00456 | 3 | 2.521008403 | 0.009410316 | PPP3CA, I  | 119 | 24 |
| GOTERM_BP_DGO:00359 | 3 | 2.521008403 | 0.010187947 | TGFB1, P   | 119 | 25 |
| GOTERM_BP_DGO:00723 | 3 | 2.521008403 | 0.010993093 | E2F1, BA   | 119 | 26 |
| GOTERM_BP_DGO:00327 | 3 | 2.521008403 | 0.010993093 | IL6, TGFI  | 119 | 26 |
| GOTERM_BP_DGO:00017 | 3 | 2.521008403 | 0.010993093 | CASP3, BC  | 119 | 26 |
| GOTERM_BP_DGO:00467 | 3 | 2.521008403 | 0.010993093 | TGFB1, H   | 119 | 26 |
| GOTERM_BP_DGO:00026 | 3 | 2.521008403 | 0.011825393 | IL10, IL6, | 119 | 27 |
| GOTERM_BP_DGO:00488 | 3 | 2.521008403 | 0.012684491 | NOS3, BC   | 119 | 28 |
| GOTERM_BP_DGO:00020 | 3 | 2.521008403 | 0.012684491 | CTNNB1,    | 119 | 28 |
| GOTERM_BP_DGO:00902 | 3 | 2.521008403 | 0.012684491 | BAX, TP5   | 119 | 28 |
| GOTERM_BP_DGO:00457 | 3 | 2.521008403 | 0.013570033 | NOS2, NC   | 119 | 29 |
| GOTERM_BP_DGO:00108 | 3 | 2.521008403 | 0.013570033 | GSTP1, A   | 119 | 29 |
| GOTERM_BP_DGO:00421 | 3 | 2.521008403 | 0.013570033 | PPP3CA, I  | 119 | 29 |
| GOTERM_BP_DGO:00109 | 3 | 2.521008403 | 0.013570033 | APP, CCN   | 119 | 29 |
| GOTERM_BP_DGO:19000 | 3 | 2.521008403 | 0.013570033 | IL6, STAT  | 119 | 29 |
| GOTERM_BP_DGO:00480 | 3 | 2.521008403 | 0.014481668 | KDR, MA    | 119 | 30 |
| GOTERM_BP_DGO:00359 | 3 | 2.521008403 | 0.015419048 | MMP2, FN   | 119 | 31 |
| GOTERM_BP_DGO:00519 | 3 | 2.521008403 | 0.015419048 | CCL2, PT   | 119 | 31 |
| GOTERM_BP_DGO:00512 | 3 | 2.521008403 | 0.015419048 | CXCL10, I  | 119 | 31 |
| GOTERM_BP_DGO:00487 | 3 | 2.521008403 | 0.015419048 | PPP3CA, I  | 119 | 31 |
| GOTERM_BP_DGO:00459 | 3 | 2.521008403 | 0.01638183  | APP, MDI   | 119 | 32 |
| GOTERM_BP_DGO:19007 | 3 | 2.521008403 | 0.01638183  | IL1B, XDI  | 119 | 32 |
| GOTERM_BP_DGO:00015 | 3 | 2.521008403 | 0.01638183  | KDR, CTI   | 119 | 32 |
| GOTERM_BP_DGO:00603 | 3 | 2.521008403 | 0.01638183  | COL1A1,    | 119 | 32 |
| GOTERM_BP_DGO:20012 | 3 | 2.521008403 | 0.017369672 | BCL2, BA   | 119 | 33 |
| GOTERM_BP_DGO:00400 | 3 | 2.521008403 | 0.017369672 | BCL2, IGI  | 119 | 33 |
| GOTERM_BP_DGO:00433 | 3 | 2.521008403 | 0.018382237 | NFKBIA,    | 119 | 34 |
| GOTERM_BP_DGO:00322 | 3 | 2.521008403 | 0.018382237 | MAPK1, C   | 119 | 34 |
| GOTERM_BP_DGO:00080 | 3 | 2.521008403 | 0.018382237 | CXCL10, I  | 119 | 34 |
| GOTERM_BP_DGO:00508 | 3 | 2.521008403 | 0.018382237 | ADIPOQ,    | 119 | 34 |
| GOTERM_BP_DGO:00459 | 3 | 2.521008403 | 0.019419191 | IL10, TGF  | 119 | 35 |
| GOTERM_BP_DGO:00700 | 3 | 2.521008403 | 0.019419191 | BCL2, BA   | 119 | 35 |
| GOTERM_BP_DGO:00100 | 3 | 2.521008403 | 0.019419191 | VCAM1, I   | 119 | 35 |
| GOTERM_BP_DGO:00725 | 3 | 2.521008403 | 0.0204802   | BCL2, TP   | 119 | 36 |
| GOTERM_BP_DGO:00074 | 3 | 2.521008403 | 0.0204802   | CTNNB1,    | 119 | 36 |
| GOTERM_BP_DGO:20012 | 3 | 2.521008403 | 0.021564938 | IL4, GSTF  | 119 | 37 |
| GOTERM_BP_DGO:00019 | 3 | 2.521008403 | 0.022673078 | NOS3, MI   | 119 | 38 |
| GOTERM_BP_DGO:00018 | 3 | 2.521008403 | 0.023804299 | PPARG, M   | 119 | 39 |
| GOTERM_BP_DGO:00019 | 3 | 2.521008403 | 0.023804299 | STAT1, A   | 119 | 39 |

|                     |   |             |             |           |     |    |
|---------------------|---|-------------|-------------|-----------|-----|----|
| GOTERM_BP_DGO:00106 | 3 | 2.521008403 | 0.023804299 | JUN, IFN  | 119 | 39 |
| GOTERM_BP_DGO:00330 | 3 | 2.521008403 | 0.023804299 | BCL2, CT  | 119 | 39 |
| GOTERM_BP_DGO:00086 | 3 | 2.521008403 | 0.023804299 | CASP8, B  | 119 | 39 |
| GOTERM_BP_DGO:00019 | 3 | 2.521008403 | 0.02495828  | PPP3CA, I | 119 | 40 |
| GOTERM_BP_DGO:00018 | 3 | 2.521008403 | 0.026134706 | ALB, HSP  | 119 | 41 |
| GOTERM_BP_DGO:20006 | 3 | 2.521008403 | 0.026134706 | KDR, CT   | 119 | 41 |
| GOTERM_BP_DGO:00420 | 3 | 2.521008403 | 0.027333263 | PPP3CB, I | 119 | 42 |
| GOTERM_BP_DGO:00302 | 3 | 2.521008403 | 0.027333263 | PPP3CB, I | 119 | 42 |
| GOTERM_BP_DGO:00072 | 3 | 2.521008403 | 0.02855364  | BAX, AK   | 119 | 43 |
| GOTERM_BP_DGO:00454 | 3 | 2.521008403 | 0.02855364  | NOS2, NO  | 119 | 43 |
| GOTERM_BP_DGO:00016 | 3 | 2.521008403 | 0.029795531 | MYC, BCL  | 119 | 44 |
| GOTERM_BP_DGO:00427 | 3 | 2.521008403 | 0.03105863  | RXRA, ST  | 119 | 45 |
| GOTERM_BP_DGO:00705 | 3 | 2.521008403 | 0.03105863  | FN1, HSP  | 119 | 45 |
| GOTERM_BP_DGO:00018 | 3 | 2.521008403 | 0.032342635 | TGFB1, C  | 119 | 46 |
| GOTERM_BP_DGO:00341 | 3 | 2.521008403 | 0.032342635 | CDKN1A    | 119 | 46 |
| GOTERM_BP_DGO:00421 | 3 | 2.521008403 | 0.034972173 | IL10, TGF | 119 | 48 |
| GOTERM_BP_DGO:00031 | 3 | 2.521008403 | 0.034972173 | JUN, HIF  | 119 | 48 |
| GOTERM_BP_DGO:00516 | 3 | 2.521008403 | 0.036317116 | CASP8, H  | 119 | 49 |
| GOTERM_BP_DGO:00457 | 3 | 2.521008403 | 0.036317116 | CCND1, A  | 119 | 49 |
| GOTERM_BP_DGO:00085 | 3 | 2.521008403 | 0.037681787 | APP, HMO  | 119 | 50 |
| GOTERM_BP_DGO:00507 | 3 | 2.521008403 | 0.037681787 | IFNG, IL  | 119 | 50 |
| GOTERM_BP_DGO:00480 | 3 | 2.521008403 | 0.039065897 | RASA1, M  | 119 | 51 |
| GOTERM_BP_DGO:19000 | 3 | 2.521008403 | 0.039065897 | CCND1, A  | 119 | 51 |
| GOTERM_BP_DGO:00325 | 3 | 2.521008403 | 0.040469163 | RXRA, TF  | 119 | 52 |
| GOTERM_BP_DGO:00095 | 3 | 2.521008403 | 0.040469163 | BAX, APC  | 119 | 52 |
| GOTERM_BP_DGO:00071 | 3 | 2.521008403 | 0.040469163 | VCAM1, S  | 119 | 52 |
| GOTERM_BP_DGO:00230 | 2 | 1.680672269 | 0.012218685 | PPP3CA, I | 119 | 2  |
| GOTERM_BP_DGO:00148 | 2 | 1.680672269 | 0.012218685 | NOS3, HM  | 119 | 2  |
| GOTERM_BP_DGO:00068 | 2 | 1.680672269 | 0.012218685 | BCL2, BA  | 119 | 2  |
| GOTERM_BP_DGO:00713 | 2 | 1.680672269 | 0.012218685 | COL1A1,   | 119 | 2  |
| GOTERM_BP_DGO:00970 | 2 | 1.680672269 | 0.012218685 | BCL2, BC  | 119 | 2  |
| GOTERM_BP_DGO:19001 | 2 | 1.680672269 | 0.018272398 | IL10, IL2 | 119 | 3  |
| GOTERM_BP_DGO:00029 | 2 | 1.680672269 | 0.018272398 | IL10, BAX | 119 | 3  |
| GOTERM_BP_DGO:00613 | 2 | 1.680672269 | 0.018272398 | MAPK1, M  | 119 | 3  |
| GOTERM_BP_DGO:00605 | 2 | 1.680672269 | 0.018272398 | IFNG, IL  | 119 | 3  |
| GOTERM_BP_DGO:00016 | 2 | 1.680672269 | 0.018272398 | IL1A, IL1 | 119 | 3  |
| GOTERM_BP_DGO:00466 | 2 | 1.680672269 | 0.018272398 | BCL2, BA  | 119 | 3  |
| GOTERM_BP_DGO:20006 | 2 | 1.680672269 | 0.018272398 | IL6, STAT | 119 | 3  |
| GOTERM_BP_DGO:00033 | 2 | 1.680672269 | 0.018272398 | STAT1, C  | 119 | 3  |
| GOTERM_BP_DGO:00190 | 2 | 1.680672269 | 0.018272398 | MYC, INS  | 119 | 3  |
| GOTERM_BP_DGO:00312 | 2 | 1.680672269 | 0.018272398 | MAPK14,   | 119 | 3  |
| GOTERM_BP_DGO:00148 | 2 | 1.680672269 | 0.018272398 | IL10, CAT | 119 | 3  |
| GOTERM_BP_DGO:00026 | 2 | 1.680672269 | 0.018272398 | MPO, PIK  | 119 | 3  |

|                      |    |             |             |           |     |      |
|----------------------|----|-------------|-------------|-----------|-----|------|
| GOTERM_BP_DGO:00344  | 2  | 1.680672269 | 0.018272398 | IL10, SOE | 119 | 3    |
| GOTERM_BP_DGO:00718  | 2  | 1.680672269 | 0.018272398 | CASP9, C  | 119 | 3    |
| GOTERM_BP_DGO:00003  | 2  | 1.680672269 | 0.024289323 | CCND1, M  | 119 | 4    |
| GOTERM_BP_DGO:00343  | 2  | 1.680672269 | 0.024289323 | CASP9, C  | 119 | 4    |
| GOTERM_BP_DGO:00459  | 2  | 1.680672269 | 0.024289323 | ADRB2, F  | 119 | 4    |
| GOTERM_BP_DGO:00904  | 2  | 1.680672269 | 0.024289323 | CDKN1A    | 119 | 4    |
| GOTERM_BP_DGO:00451  | 2  | 1.680672269 | 0.024289323 | IL10, IL4 | 119 | 4    |
| GOTERM_BP_DGO:00901  | 2  | 1.680672269 | 0.024289323 | MAPK1, M  | 119 | 4    |
| GOTERM_BP_DGO:00708  | 2  | 1.680672269 | 0.024289323 | MAPK1, M  | 119 | 4    |
| GOTERM_BP_DGO:00335  | 2  | 1.680672269 | 0.024289323 | RELA, EC  | 119 | 4    |
| GOTERM_BP_DGO:00485  | 2  | 1.680672269 | 0.024289323 | KDR, BA   | 119 | 4    |
| GOTERM_BP_DGO:00015  | 2  | 1.680672269 | 0.024289323 | HSPA5, C  | 119 | 4    |
| GOTERM_BP_DGO:19906  | 2  | 1.680672269 | 0.024289323 | MYC, FO   | 119 | 4    |
| GOTERM_BP_DGO:00727  | 2  | 1.680672269 | 0.024289323 | MDM2, T   | 119 | 4    |
| GOTERM_BP_DGO:19016  | 2  | 1.680672269 | 0.024289323 | GSTM1, C  | 119 | 4    |
| GOTERM_BP_DGO:00459  | 2  | 1.680672269 | 0.030269681 | ADIPOQ,   | 119 | 5    |
| GOTERM_BP_DGO:00323  | 2  | 1.680672269 | 0.030269681 | NOS2, PT  | 119 | 5    |
| GOTERM_BP_DGO:19052  | 2  | 1.680672269 | 0.030269681 | EGF, VEC  | 119 | 5    |
| GOTERM_BP_DGO:00023  | 2  | 1.680672269 | 0.030269681 | BCL2, TP  | 119 | 5    |
| GOTERM_BP_DGO:19025  | 2  | 1.680672269 | 0.030269681 | IL6, BAX  | 119 | 5    |
| GOTERM_BP_DGO:00316  | 2  | 1.680672269 | 0.030269681 | IL1B, PTC | 119 | 5    |
| GOTERM_BP_DGO:19038  | 2  | 1.680672269 | 0.030269681 | IL4, PPAF | 119 | 5    |
| GOTERM_BP_DGO:00363  | 2  | 1.680672269 | 0.030269681 | KDR, VE   | 119 | 5    |
| GOTERM_BP_DGO:00605  | 2  | 1.680672269 | 0.030269681 | CDKN1A    | 119 | 5    |
| GOTERM_BP_DGO:00716  | 2  | 1.680672269 | 0.030269681 | IL4, TGFI | 119 | 5    |
| GOTERM_BP_DGO:20004  | 2  | 1.680672269 | 0.030269681 | ADIPOQ,   | 119 | 5    |
| GOTERM_BP_DGO:00725  | 2  | 1.680672269 | 0.030269681 | MAPK1, M  | 119 | 5    |
| GOTERM_BP_DGO:00226  | 2  | 1.680672269 | 0.030269681 | VCAM1, I  | 119 | 5    |
| GOTERM_BP_DGO:00330  | 2  | 1.680672269 | 0.036213693 | IL1A, IL1 | 119 | 6    |
| GOTERM_BP_DGO:00517  | 2  | 1.680672269 | 0.036213693 | IFNG, NC  | 119 | 6    |
| GOTERM_BP_DGO:00330  | 2  | 1.680672269 | 0.036213693 | CDKN2A    | 119 | 6    |
| GOTERM_BP_DGO:00436  | 2  | 1.680672269 | 0.036213693 | HMOX1,    | 119 | 6    |
| GOTERM_BP_DGO:20004  | 2  | 1.680672269 | 0.036213693 | ADIPOQ,   | 119 | 6    |
| GOTERM_BP_DGO:19047  | 2  | 1.680672269 | 0.036213693 | IFNG, CT  | 119 | 6    |
| GOTERM_BP_DGO:00101  | 2  | 1.680672269 | 0.036213693 | IL1A, CA  | 119 | 6    |
| GOTERM_BP_DGO:00435  | 2  | 1.680672269 | 0.036213693 | PARP1, T  | 119 | 6    |
| GOTERM_BP_DGO:19048  | 2  | 1.680672269 | 0.036213693 | IL6, TGFI | 119 | 6    |
| GOTERM_BP_DGO:00313  | 2  | 1.680672269 | 0.042121578 | IL1B, PTC | 119 | 7    |
| GOTERM_BP_DGO:00306  | 2  | 1.680672269 | 0.042121578 | MAPK1, M  | 119 | 7    |
| GOTERM_BP_DGO:00713  | 2  | 1.680672269 | 0.042121578 | CCNA2, F  | 119 | 7    |
| GOTERM_BP_DGO:00310  | 2  | 1.680672269 | 0.042121578 | INSR, IGI | 119 | 7    |
| GOTERM_BP_DGO:19001  | 2  | 1.680672269 | 0.042121578 | APP, MM   | 119 | 7    |
| GOTERM_CC_IIGO:00058 | 59 | 49.57983193 | 1.64E-07    | APP, CDF  | 119 | 5477 |

|                      |    |             |                       |     |      |
|----------------------|----|-------------|-----------------------|-----|------|
| GOTERM_CC_I GO:00057 | 57 | 47.89915966 | 2.01E-06 APP, PTE     | 119 | 5570 |
| GOTERM_CC_I GO:00056 | 57 | 47.89915966 | 1.58E-05 APP, CDF     | 119 | 5930 |
| GOTERM_CC_I GO:00056 | 51 | 42.85714286 | 2.90E-21 APP, CXC     | 119 | 1936 |
| GOTERM_CC_I GO:00058 | 51 | 42.85714286 | 1.95E-05 APP, TFR     | 119 | 5066 |
| GOTERM_CC_I GO:00056 | 48 | 40.33613445 | 1.75E-07 CDKN1A       | 119 | 3939 |
| GOTERM_CC_I GO:00055 | 47 | 39.49579832 | 2.24E-16 CRP, APP     | 119 | 2127 |
| GOTERM_CC_I GO:00700 | 35 | 29.41176471 | 6.00E-08 APP, PCN     | 119 | 2218 |
| GOTERM_CC_I GO:00057 | 27 | 22.68907563 | 1.39E-07 MT-ND6,      | 119 | 1437 |
| GOTERM_CC_I GO:00160 | 26 | 21.8487395  | 0.005041827 APP, TFR  | 119 | 2547 |
| GOTERM_CC_I GO:00329 | 23 | 19.32773109 | 8.38E-11 APP, CDF     | 119 | 703  |
| GOTERM_CC_I GO:00099 | 18 | 15.12605042 | 1.49E-07 APP, TGF     | 119 | 638  |
| GOTERM_CC_I GO:00058 | 18 | 15.12605042 | 0.005810364 APP, VCA  | 119 | 1508 |
| GOTERM_CC_I GO:00484 | 17 | 14.28571429 | 7.96E-06 APP, CDF     | 119 | 763  |
| GOTERM_CC_I GO:00057 | 17 | 14.28571429 | 8.59E-04 APP, VCA     | 119 | 1142 |
| GOTERM_CC_I GO:00007 | 16 | 13.44537815 | 0.001107718 JUN, PCN  | 119 | 1057 |
| GOTERM_CC_I GO:00057 | 15 | 12.60504202 | 0.005200137 APP, VCA  | 119 | 1122 |
| GOTERM_CC_I GO:00057 | 13 | 10.92436975 | 2.08E-07 APP, HSP     | 119 | 306  |
| GOTERM_CC_I GO:00098 | 13 | 10.92436975 | 1.30E-05 VCAM1, T     | 119 | 456  |
| GOTERM_CC_I GO:00056 | 12 | 10.08403361 | 9.87E-08 JUN, RXR     | 119 | 231  |
| GOTERM_CC_I GO:00432 | 11 | 9.243697479 | 5.23E-07 APP, RXR     | 119 | 217  |
| GOTERM_CC_I GO:00432 | 11 | 9.243697479 | 0.057309101 TFRC, HS  | 119 | 982  |
| GOTERM_CC_I GO:00057 | 11 | 9.243697479 | 0.08227646 HSPA5, B   | 119 | 1052 |
| GOTERM_CC_I GO:00451 | 10 | 8.403361345 | 1.52E-05 APP, CAS     | 119 | 251  |
| GOTERM_CC_I GO:00057 | 10 | 8.403361345 | 7.49E-05 APP, VCA     | 119 | 308  |
| GOTERM_CC_I GO:00059 | 9  | 7.56302521  | 0.003197252 HSPA5, P  | 119 | 424  |
| GOTERM_CC_I GO:00310 | 8  | 6.722689076 | 1.15E-07 APP, TGF     | 119 | 67   |
| GOTERM_CC_I GO:00059 | 8  | 6.722689076 | 3.04E-07 NOS3, IN     | 119 | 77   |
| GOTERM_CC_I GO:00905 | 8  | 6.722689076 | 6.49E-06 JUN, RXR     | 119 | 121  |
| GOTERM_CC_I GO:19048 | 8  | 6.722689076 | 7.62E-06 ALOX5, C     | 119 | 124  |
| GOTERM_CC_I GO:00100 | 8  | 6.722689076 | 6.67E-04 TFRC, IN     | 119 | 253  |
| GOTERM_CC_I GO:00057 | 8  | 6.722689076 | 0.002109486 IL1B, INS | 119 | 309  |
| GOTERM_CC_I GO:00725 | 7  | 5.882352941 | 1.96E-04 IGHG1, T     | 119 | 145  |
| GOTERM_CC_I GO:00310 | 7  | 5.882352941 | 0.003920253 COL1A1,   | 119 | 259  |
| GOTERM_CC_I GO:00163 | 7  | 5.882352941 | 0.021336638 CLDN4, M  | 119 | 374  |
| GOTERM_CC_I GO:00306 | 6  | 5.042016807 | 5.24E-05 TFRC, EC     | 119 | 70   |
| GOTERM_CC_I GO:00301 | 6  | 5.042016807 | 2.71E-04 COL1A1,      | 119 | 99   |
| GOTERM_CC_I GO:00057 | 6  | 5.042016807 | 0.005018062 CASP8, B  | 119 | 191  |
| GOTERM_CC_I GO:00056 | 6  | 5.042016807 | 0.005356052 PARP1, A  | 119 | 194  |
| GOTERM_CC_I GO:00319 | 6  | 5.042016807 | 0.012952643 CCND1, C  | 119 | 241  |
| GOTERM_CC_I GO:00166 | 6  | 5.042016807 | 0.04662411 CDKN1A     | 119 | 339  |
| GOTERM_CC_I GO:00304 | 6  | 5.042016807 | 0.058033184 APP, TGF  | 119 | 361  |
| GOTERM_CC_I GO:00989 | 6  | 5.042016807 | 0.064876307 PPP3CA, I | 119 | 373  |
| GOTERM_CC_I GO:00430 | 6  | 5.042016807 | 0.068461456 CASP8, P  | 119 | 379  |

|                      |   |             |             |           |     |     |
|----------------------|---|-------------|-------------|-----------|-----|-----|
| GOTERM_CC_I GO:00003 | 5 | 4.201680672 | 8.17E-05    | CCNA2, C  | 119 | 40  |
| GOTERM_CC_I GO:00451 | 5 | 4.201680672 | 0.001077046 | APP, VCA  | 119 | 78  |
| GOTERM_CC_I GO:00300 | 5 | 4.201680672 | 0.007580613 | PPP3CA, I | 119 | 134 |
| GOTERM_CC_I GO:00163 | 5 | 4.201680672 | 0.049048034 | TFRC, ER  | 119 | 238 |
| GOTERM_CC_I GO:00329 | 4 | 3.361344538 | 0.002365569 | PARP1, C  | 119 | 46  |
| GOTERM_CC_I GO:00059 | 4 | 3.361344538 | 0.005268461 | APP, TFR  | 119 | 61  |
| GOTERM_CC_I GO:00170 | 4 | 3.361344538 | 0.005764999 | JUN, CCN  | 119 | 63  |
| GOTERM_CC_I GO:00986 | 4 | 3.361344538 | 0.013930406 | PPP3CA, I | 119 | 87  |
| GOTERM_CC_I GO:00057 | 4 | 3.361344538 | 0.027024272 | NOS2, CA  | 119 | 112 |
| GOTERM_CC_I GO:00347 | 4 | 3.361344538 | 0.028917309 | ALOX5, C  | 119 | 115 |
| GOTERM_CC_I GO:00059 | 4 | 3.361344538 | 0.039406821 | CLDN4, C  | 119 | 130 |
| GOTERM_CC_I GO:00057 | 4 | 3.361344538 | 0.054192246 | INSR, MA  | 119 | 148 |
| GOTERM_CC_I GO:00059 | 4 | 3.361344538 | 0.099548754 | APP, CLD  | 119 | 192 |
| GOTERM_CC_I GO:00971 | 3 | 2.521008403 | 3.26E-04    | PLAU, SE  | 119 | 5   |
| GOTERM_CC_I GO:00971 | 3 | 2.521008403 | 9.02E-04    | BAX, BCI  | 119 | 8   |
| GOTERM_CC_I GO:00163 | 3 | 2.521008403 | 0.007700538 | THBD, CI  | 119 | 23  |
| GOTERM_CC_I GO:00343 | 3 | 2.521008403 | 0.010524413 | APP, PON  | 119 | 27  |
| GOTERM_CC_I GO:00057 | 3 | 2.521008403 | 0.010524413 | APP, HSP  | 119 | 27  |
| GOTERM_CC_I GO:00099 | 3 | 2.521008403 | 0.034961642 | CLDN4, E  | 119 | 51  |
| GOTERM_CC_I GO:00002 | 3 | 2.521008403 | 0.038806143 | JUN, E2F  | 119 | 54  |
| GOTERM_CC_I GO:19047 | 3 | 2.521008403 | 0.040121935 | LTA4H, C  | 119 | 55  |
| GOTERM_CC_I GO:00098 | 3 | 2.521008403 | 0.048360403 | PPP3CA, C | 119 | 61  |
| GOTERM_CC_I GO:00007 | 3 | 2.521008403 | 0.051232036 | JUN, CTN  | 119 | 63  |
| GOTERM_CC_I GO:19041 | 3 | 2.521008403 | 0.052690378 | HSPB1, H  | 119 | 64  |
| GOTERM_CC_I GO:00163 | 3 | 2.521008403 | 0.066452805 | CLDN4, C  | 119 | 73  |
| GOTERM_CC_I GO:00708 | 3 | 2.521008403 | 0.066452805 | MGAM, P   | 119 | 73  |
| GOTERM_CC_I GO:00055 | 3 | 2.521008403 | 0.098762454 | COL1A1,   | 119 | 92  |
| GOTERM_CC_I GO:00971 | 2 | 1.680672269 | 0.011494997 | CCND1, C  | 119 | 2   |
| GOTERM_CC_I GO:00705 | 2 | 1.680672269 | 0.011494997 | CDKN1A    | 119 | 2   |
| GOTERM_CC_I GO:00359 | 2 | 1.680672269 | 0.028492279 | JUN, FOS  | 119 | 5   |
| GOTERM_CC_I GO:00974 | 2 | 1.680672269 | 0.034093389 | KDR, LD   | 119 | 6   |
| GOTERM_CC_I GO:00059 | 2 | 1.680672269 | 0.034093389 | PPP3CA, I | 119 | 6   |
| GOTERM_CC_I GO:00343 | 2 | 1.680672269 | 0.034093389 | APP, APC  | 119 | 6   |
| GOTERM_CC_I GO:00082 | 2 | 1.680672269 | 0.039662478 | PPP3CA, I | 119 | 7   |
| GOTERM_CC_I GO:00312 | 2 | 1.680672269 | 0.039662478 | CASP8, C  | 119 | 7   |
| GOTERM_CC_I GO:00166 | 2 | 1.680672269 | 0.05070532  | CTNNB1,   | 119 | 9   |
| GOTERM_CC_I GO:00360 | 2 | 1.680672269 | 0.05070532  | PPP3CA, I | 119 | 9   |
| GOTERM_CC_I GO:00056 | 2 | 1.680672269 | 0.056179433 | APP, ALC  | 119 | 10  |
| GOTERM_CC_I GO:00432 | 2 | 1.680672269 | 0.061622245 | PTEN, AF  | 119 | 11  |
| GOTERM_CC_I GO:19053 | 2 | 1.680672269 | 0.061622245 | THBD, PI  | 119 | 11  |
| GOTERM_CC_I GO:00469 | 2 | 1.680672269 | 0.072414677 | BCL2, BA  | 119 | 13  |
| GOTERM_CC_I GO:00343 | 2 | 1.680672269 | 0.077764649 | APOB, LI  | 119 | 14  |
| GOTERM_CC_I GO:00319 | 2 | 1.680672269 | 0.098860299 | APP, APC  | 119 | 18  |

|                     |     |             |             |            |     |       |
|---------------------|-----|-------------|-------------|------------|-----|-------|
| GOTERM_CC_IGO:00311 | 2   | 1.680672269 | 0.098860299 | MAPK1, M   | 119 | 18    |
| GOTERM_CC_IGO:00442 | 2   | 1.680672269 | 0.098860299 | ERBB2, E   | 119 | 18    |
| GOTERM_MF_IGO:00055 | 112 | 94.11764706 | 6.80E-13    | APP, TFR   | 119 | 12539 |
| GOTERM_MF_IGO:00428 | 46  | 38.65546218 | 8.24E-18    | CRP, APP   | 119 | 1712  |
| GOTERM_MF_IGO:00198 | 31  | 26.05042017 | 1.78E-24    | APP, PCN   | 119 | 390   |
| GOTERM_MF_IGO:00428 | 23  | 19.32773109 | 5.33E-10    | APP, GST   | 119 | 713   |
| GOTERM_MF_IGO:00199 | 20  | 16.80672269 | 4.19E-10    | CDKN1A     | 119 | 510   |
| GOTERM_MF_IGO:00036 | 19  | 15.96638655 | 0.001076012 | APP, JUN   | 119 | 1286  |
| GOTERM_MF_IGO:00448 | 17  | 14.28571429 | 6.81E-09    | CDKN1A     | 119 | 414   |
| GOTERM_MF_IGO:00009 | 16  | 13.44537815 | 0.008498451 | APP, JUN   | 119 | 1207  |
| GOTERM_MF_IGO:00081 | 14  | 11.76470588 | 6.76E-10    | JUN, PAR   | 119 | 209   |
| GOTERM_MF_IGO:00037 | 14  | 11.76470588 | 4.50E-05    | JUN, STA   | 119 | 554   |
| GOTERM_MF_IGO:00082 | 14  | 11.76470588 | 0.003277052 | PARP1, M   | 119 | 873   |
| GOTERM_MF_IGO:00009 | 14  | 11.76470588 | 0.057586113 | JUN, STA   | 119 | 1279  |
| GOTERM_MF_IGO:00051 | 12  | 10.08403361 | 3.48E-08    | IL10, IL4, | 119 | 192   |
| GOTERM_MF_IGO:00316 | 12  | 10.08403361 | 3.49E-06    | NFKBIA,    | 119 | 305   |
| GOTERM_MF_IGO:00036 | 12  | 10.08403361 | 1.73E-04    | APP, JUN   | 119 | 467   |
| GOTERM_MF_IGO:00051 | 11  | 9.243697479 | 7.03E-08    | APP, VCA   | 119 | 161   |
| GOTERM_MF_IGO:00051 | 11  | 9.243697479 | 1.97E-04    | CXCL10, .  | 119 | 396   |
| GOTERM_MF_IGO:00046 | 10  | 8.403361345 | 6.46E-04    | CCND1, C   | 119 | 379   |
| GOTERM_MF_IGO:00020 | 9   | 7.56302521  | 4.23E-07    | COL1A1,    | 119 | 109   |
| GOTERM_MF_IGO:00082 | 9   | 7.56302521  | 4.86E-07    | CASP9, A   | 119 | 111   |
| GOTERM_MF_IGO:00080 | 9   | 7.56302521  | 9.97E-06    | IL10, IL4, | 119 | 166   |
| GOTERM_MF_IGO:00616 | 9   | 7.56302521  | 2.46E-05    | JUN, PAR   | 119 | 188   |
| GOTERM_MF_IGO:00163 | 9   | 7.56302521  | 9.03E-05    | CDKN1A     | 119 | 226   |
| GOTERM_MF_IGO:00199 | 9   | 7.56302521  | 2.55E-04    | CCNA2, F   | 119 | 263   |
| GOTERM_MF_IGO:00469 | 9   | 7.56302521  | 0.002363676 | APP, CHU   | 119 | 371   |
| GOTERM_MF_IGO:00046 | 9   | 7.56302521  | 0.003308896 | CHUK, C    | 119 | 392   |
| GOTERM_MF_IGO:00012 | 9   | 7.56302521  | 0.009929577 | JUN, MYC   | 119 | 473   |
| GOTERM_MF_IGO:00510 | 8   | 6.722689076 | 5.96E-06    | APP, TFR   | 119 | 110   |
| GOTERM_MF_IGO:00200 | 8   | 6.722689076 | 4.49E-05    | NOS2, NO   | 119 | 150   |
| GOTERM_MF_IGO:00469 | 8   | 6.722689076 | 1.10E-04    | IL10, PPP  | 119 | 173   |
| GOTERM_MF_IGO:00082 | 8   | 6.722689076 | 1.23E-04    | CXCL10, .  | 119 | 176   |
| GOTERM_MF_IGO:00042 | 8   | 6.722689076 | 2.24E-04    | PLAU, M    | 119 | 194   |
| GOTERM_MF_IGO:00199 | 7   | 5.882352941 | 2.62E-05    | ERBB2, S   | 119 | 93    |
| GOTERM_MF_IGO:00036 | 7   | 5.882352941 | 9.52E-05    | RXRA, ST   | 119 | 117   |
| GOTERM_MF_IGO:00055 | 7   | 5.882352941 | 0.001865979 | PPP3CA, I  | 119 | 205   |
| GOTERM_MF_IGO:00009 | 7   | 5.882352941 | 0.00390983  | JUN, RXR   | 119 | 238   |
| GOTERM_MF_IGO:00435 | 7   | 5.882352941 | 0.017374535 | RXRA, M    | 119 | 328   |
| GOTERM_MF_IGO:00517 | 6   | 5.042016807 | 2.49E-06    | STAT1, B   | 119 | 35    |
| GOTERM_MF_IGO:00474 | 6   | 5.042016807 | 8.22E-04    | TGFB1, P   | 119 | 116   |
| GOTERM_MF_IGO:00048 | 6   | 5.042016807 | 0.006810085 | THBD, CI   | 119 | 189   |
| GOTERM_MF_IGO:00012 | 6   | 5.042016807 | 0.057559897 | JUN, MYC   | 119 | 331   |

|                     |   |             |             |           |     |     |
|---------------------|---|-------------|-------------|-----------|-----|-----|
| GOTERM_MF_IGO:00977 | 5 | 4.201680672 | 8.28E-05    | CDKN2A    | 119 | 37  |
| GOTERM_MF_IGO:00012 | 5 | 4.201680672 | 9.21E-05    | RXRA, M   | 119 | 38  |
| GOTERM_MF_IGO:00506 | 5 | 4.201680672 | 1.37E-04    | NOS2, NC  | 119 | 42  |
| GOTERM_MF_IGO:00971 | 5 | 4.201680672 | 9.29E-04    | CASP8, CI | 119 | 69  |
| GOTERM_MF_IGO:00428 | 5 | 4.201680672 | 0.009606756 | CCND1, I  | 119 | 132 |
| GOTERM_MF_IGO:00080 | 5 | 4.201680672 | 0.042094575 | PCNA, EI  | 119 | 208 |
| GOTERM_MF_IGO:00514 | 4 | 3.361344538 | 4.75E-06    | BCL2, BA  | 119 | 6   |
| GOTERM_MF_IGO:00704 | 4 | 3.361344538 | 4.42E-04    | JUN, PAR  | 119 | 24  |
| GOTERM_MF_IGO:00303 | 4 | 3.361344538 | 0.002818169 | PCNA, PA  | 119 | 45  |
| GOTERM_MF_IGO:00169 | 4 | 3.361344538 | 0.003191212 | RXRA, ST  | 119 | 47  |
| GOTERM_MF_IGO:00048 | 4 | 3.361344538 | 0.004728976 | RXRA, ST  | 119 | 54  |
| GOTERM_MF_IGO:00055 | 4 | 3.361344538 | 0.005777176 | IL1A, ALI | 119 | 58  |
| GOTERM_MF_IGO:00506 | 4 | 3.361344538 | 0.008968481 | NOS2, NC  | 119 | 68  |
| GOTERM_MF_IGO:00020 | 4 | 3.361344538 | 0.010090621 | CDKN2A    | 119 | 71  |
| GOTERM_MF_IGO:00082 | 4 | 3.361344538 | 0.010090621 | MMP2, M   | 119 | 71  |
| GOTERM_MF_IGO:00016 | 4 | 3.361344538 | 0.012134799 | TFRC, LD  | 119 | 76  |
| GOTERM_MF_IGO:00041 | 4 | 3.361344538 | 0.01741342  | MMP1, M   | 119 | 87  |
| GOTERM_MF_IGO:00041 | 4 | 3.361344538 | 0.023160624 | CASP9, C. | 119 | 97  |
| GOTERM_MF_IGO:00047 | 4 | 3.361344538 | 0.034244139 | INSR, ER  | 119 | 113 |
| GOTERM_MF_IGO:00047 | 4 | 3.361344538 | 0.036578777 | INSR, ER  | 119 | 116 |
| GOTERM_MF_IGO:00042 | 4 | 3.361344538 | 0.039815875 | MMP1, M   | 119 | 120 |
| GOTERM_MF_IGO:00972 | 3 | 2.521008403 | 0.00136478  | CASP9, C. | 119 | 9   |
| GOTERM_MF_IGO:00971 | 3 | 2.521008403 | 0.001698984 | CASP9, C. | 119 | 10  |
| GOTERM_MF_IGO:00971 | 3 | 2.521008403 | 0.001698984 | CASP9, C. | 119 | 10  |
| GOTERM_MF_IGO:00048 | 3 | 2.521008403 | 0.002471478 | CDKN1A    | 119 | 12  |
| GOTERM_MF_IGO:00167 | 3 | 2.521008403 | 0.002908886 | ALOX5, F  | 119 | 13  |
| GOTERM_MF_IGO:00012 | 3 | 2.521008403 | 0.004420552 | E2F1, HIF | 119 | 16  |
| GOTERM_MF_IGO:00047 | 3 | 2.521008403 | 0.004420552 | MAPK1, M  | 119 | 16  |
| GOTERM_MF_IGO:00047 | 3 | 2.521008403 | 0.005590273 | MAPK1, M  | 119 | 18  |
| GOTERM_MF_IGO:00009 | 3 | 2.521008403 | 0.006885652 | STAT1, FO | 119 | 20  |
| GOTERM_MF_IGO:00350 | 3 | 2.521008403 | 0.010652525 | PCNA, ST  | 119 | 25  |
| GOTERM_MF_IGO:00507 | 3 | 2.521008403 | 0.010652525 | CRP, APP  | 119 | 25  |
| GOTERM_MF_IGO:00051 | 3 | 2.521008403 | 0.017117704 | CASP8, CI | 119 | 32  |
| GOTERM_MF_IGO:00019 | 3 | 2.521008403 | 0.017117704 | MMP2, IC  | 119 | 32  |
| GOTERM_MF_IGO:00510 | 3 | 2.521008403 | 0.018148239 | NFKBIA,   | 119 | 33  |
| GOTERM_MF_IGO:00165 | 3 | 2.521008403 | 0.019204413 | CCNA2, C  | 119 | 34  |
| GOTERM_MF_IGO:00420 | 3 | 2.521008403 | 0.021392257 | CXCL10, L | 119 | 36  |
| GOTERM_MF_IGO:00046 | 3 | 2.521008403 | 0.021392257 | PTGS2, M  | 119 | 36  |
| GOTERM_MF_IGO:00012 | 3 | 2.521008403 | 0.031099551 | STAT1, H  | 119 | 44  |
| GOTERM_MF_IGO:00435 | 3 | 2.521008403 | 0.032414964 | TGFB1, C  | 119 | 45  |
| GOTERM_MF_IGO:00017 | 3 | 2.521008403 | 0.035110213 | RASA1, M  | 119 | 47  |
| GOTERM_MF_IGO:00708 | 3 | 2.521008403 | 0.037889256 | MYC, PP/  | 119 | 49  |
| GOTERM_MF_IGO:00080 | 3 | 2.521008403 | 0.039309424 | CXCL10, C | 119 | 50  |



|                     |   |             |             |           |     |    |
|---------------------|---|-------------|-------------|-----------|-----|----|
| GOTERM_MF_IGO:00480 | 3 | 2.521008403 | 0.049794512 | EGF, IGF  | 119 | 57 |
| GOTERM_MF_IGO:00047 | 3 | 2.521008403 | 0.054563431 | PPP3CA, I | 119 | 60 |
| GOTERM_MF_IGO:00422 | 3 | 2.521008403 | 0.068014499 | RXRA, PE  | 119 | 68 |
| GOTERM_MF_IGO:00170 | 3 | 2.521008403 | 0.08242717  | PPP3CA, I | 119 | 76 |
| GOTERM_MF_IGO:00314 | 3 | 2.521008403 | 0.095728492 | STAT3, RI | 119 | 83 |
| GOTERM_MF_IGO:00046 | 2 | 1.680672269 | 0.012506833 | PTGS2, P' | 119 | 2  |
| GOTERM_MF_IGO:00514 | 2 | 1.680672269 | 0.018701962 | APP, INSI | 119 | 3  |
| GOTERM_MF_IGO:00045 | 2 | 1.680672269 | 0.018701962 | NOS2, NC  | 119 | 3  |
| GOTERM_MF_IGO:00506 | 2 | 1.680672269 | 0.024858554 | RXRA, PE  | 119 | 4  |
| GOTERM_MF_IGO:00346 | 2 | 1.680672269 | 0.024858554 | NOS2, NC  | 119 | 4  |
| GOTERM_MF_IGO:00331 | 2 | 1.680672269 | 0.030976844 | PPP3CA, I | 119 | 5  |
| GOTERM_MF_IGO:00303 | 2 | 1.680672269 | 0.043099467 | PPP3CB, S | 119 | 7  |
| GOTERM_MF_IGO:00506 | 2 | 1.680672269 | 0.043099467 | RXRA, PE  | 119 | 7  |
| GOTERM_MF_IGO:00317 | 2 | 1.680672269 | 0.049104267 | STAT1, SI | 119 | 8  |
| GOTERM_MF_IGO:00319 | 2 | 1.680672269 | 0.049104267 | INSR, IGI | 119 | 8  |
| GOTERM_MF_IGO:00302 | 2 | 1.680672269 | 0.055071703 | AKT1, EC  | 119 | 9  |
| GOTERM_MF_IGO:00346 | 2 | 1.680672269 | 0.055071703 | NOS2, NC  | 119 | 9  |
| GOTERM_MF_IGO:00165 | 2 | 1.680672269 | 0.066895402 | APP, FN1  | 119 | 11 |
| GOTERM_MF_IGO:00083 | 2 | 1.680672269 | 0.072752123 | CDK4, M   | 119 | 12 |
| GOTERM_MF_IGO:00973 | 2 | 1.680672269 | 0.072752123 | CDKN2A    | 119 | 12 |
| GOTERM_MF_IGO:00319 | 2 | 1.680672269 | 0.078572392 | INSR, IGI | 119 | 13 |
| GOTERM_MF_IGO:00428 | 2 | 1.680672269 | 0.078572392 | TRPC6, R  | 119 | 13 |
| GOTERM_MF_IGO:00302 | 2 | 1.680672269 | 0.090104478 | EGF, EGI  | 119 | 15 |
| GOTERM_MF_IGO:00051 | 2 | 1.680672269 | 0.090104478 | IL1A, IL1 | 119 | 15 |
| GOTERM_MF_IGO:00452 | 2 | 1.680672269 | 0.090104478 | CXCL10, C | 119 | 15 |
| GOTERM_MF_IGO:00051 | 2 | 1.680672269 | 0.090104478 | PTEN, VE  | 119 | 15 |
| GOTERM_MF_IGO:00050 | 2 | 1.680672269 | 0.090104478 | OLR1, LE  | 119 | 15 |
| GOTERM_MF_IGO:00167 | 2 | 1.680672269 | 0.09581674  | NOS2, NC  | 119 | 16 |
| GOTERM_MF_IGO:00051 | 2 | 1.680672269 | 0.09581674  | CASP8, C  | 119 | 16 |
| GOTERM_MF_IGO:00051 | 2 | 1.680672269 | 0.09581674  | INSR, IGI | 119 | 16 |
